1 An examination of the evolve-and-resequence method using

2 *Drosophila simulans*

3  
4  
5  
6  
7 John K. Kelly<sup>1\*</sup> and Kimberly A. Hughes<sup>2</sup>

8  
9 <sup>1</sup>Department of Ecology and Evolutionary Biology, University of Kansas,

10 1200 Sunnyside Ave., Lawrence, KS, 66045, USA

11  
12 <sup>2</sup>Department of Biological Science, Florida State University,

13 319 Stadium Dr., Tallahassee, FL 32306 USA

14  
15 \*Correspondence: [jkk@ku.edu](mailto:jkk@ku.edu)

16

17 **Abstract**

18  
19 We develop a set of analytical and simulation tools for Evolve-and-Resequencing (E&R)  
20 experiments and apply them to a new study of rapid evolution in *Drosophila simulans*.  
21 Likelihood based test statistics combined with permutation suggest parallel evolution of about  
22 120 polymorphisms across the genome. Whole genome simulations calibrated from several  
23 *Drosophila* genetic datasets indicate this response could be generated by as few as 20 loci under  
24 strong directional selection, with a corresponding hitch-hiking effect. While this resolves the  
25 “excessive significance” paradox typical of E&R experiments, a rank-based correlation analysis  
26 of genomic windows that suggests that weaker selection might be acting at a much larger number  
27 of sites. Finally, the allele frequency spectrum at sites that experience strong selection in the  
28 novel laboratory environment suggests that loci responding to selection may be balanced  
29 polymorphisms in nature.

30  
31 Key words: genomics, Evolve-and-Resequencing, *Drosophila simulans*

32  
33 **Introduction**

34  
35 In Evolve-and-Resequencing (E&R) experiments, populations evolve within one or more  
36 controlled environments and are then surveyed with genomic sequencing (NUZHIDIN AND  
37 TURNER 2013; LONG *et al.* 2015). The volume of data that emerges from an E&R study is  
38 remarkable, typically allele frequency changes at hundreds of thousands of loci within replicated  
39 populations. While researchers naturally focus on the small fraction of sites exhibiting the

40 largest or most consistent changes, a wealth of information resides in the ‘background response’,  
41 i.e. the evolution observed of polymorphisms that are not direct targets of selection (the  
42 overwhelming majority of the genome). In this paper, we present an analytical framework for  
43 E&R studies, first to provide more detailed predictions regarding whole genome evolution, and  
44 second to robustly detect loci under parallel selection across replicate populations. We apply the  
45 method to results from a new E&R experiment on *Drosophila simulans* designed to answer two  
46 major questions: What is the genomic basis of rapid adaptation to a novel environment? What do  
47 the features of the genetic response tell us about the maintenance of polymorphisms in nature?  
48

49 ***The genetic basis of rapid adaptation***—The traditional view of the tempo of adaptive evolution  
50 is that evolutionary change is slow relative to the ecological processes that influence  
51 contemporary populations (SLOBODKIN 1980; GILLESPIE 1991). In this paradigm, genetic change  
52 does not interact with ecological and demographic processes over the short time scale (few to  
53 several generations) encompassed by ecological processes (THOMPSON 1998; HENDRY AND  
54 KINNISON 1999; PALUMBI 2001; HAIRSTON *et al.* 2005). However, examples of rapid phenotypic  
55 evolution have been known since the mid-20<sup>th</sup> century (KETTLEWELL 1958. ; FORD 1964;  
56 JOHNSTON AND SELANDER 1964) and its prevalence has become increasingly appreciated in  
57 recent years. Rapid evolution has profound practical consequences for biological control of  
58 pathogens, pests and invasive species, fisheries management, and biodiversity conservation  
59 (CONOVER AND MUNCH 2002; DARIMONT *et al.* 2009), especially in the context of accelerating  
60 climate change (WARD AND KELLY 2004). Indeed, this growing appreciation for the potential  
61 importance of rapid evolution has spawned new subdisciplines such as eco-evolutionary  
62 dynamics (ELLNER *et al.* 2011).

63

64 Many instances of rapid evolution of ecologically important traits have been documented in  
65 invertebrates (ELLNER *et al.* 1999; DABORN *et al.* 2002), vertebrates (REZNICK *et al.* 1997;  
66 GRANT 1999), plants (FRANKS AND WEIS 2008), yeast (LANG *et al.* 2013; LEVY *et al.* 2015), and  
67 prokaryotes (BARRICK *et al.* 2009). Biochemical (GHALAMBOR *et al.* 2015; HUANG AND  
68 AGRAWAL 2016), morphological (LOSOS *et al.* 1997; GRANT 1999), life history (ROSE 1984;  
69 HAIRSTON AND WALTON 1986; REZNICK *et al.* 1997), and behavioral (TURNER AND MILLER  
70 2012b; STUART *et al.* 2014) phenotypes can evolve substantially in just a handful of generations  
71 when populations experience new selective regimes. However, less is known about the genomic  
72 changes that occur during rapid adaptation to novel environments, especially in multicellular  
73 eukaryotes (MESSER *et al.* 2016; JAIN AND STEPHAN 2017).

74

75 A key question is whether the standing genetic variation within populations is sufficient for  
76 adaptation to a novel environment, or if new mutations are required. In sexual eukaryotes,  
77 abundant standing variation is indicated by the observation that artificial selection can  
78 immediately, and often dramatically, change the mean of almost any variable trait (LEWONTIN  
79 1974). Still, it is possible that natural selection may fail where artificial selection succeeds if the  
80 alleles that respond in artificial selection experiments are encumbered with deleterious side  
81 effects. E&R studies seem an ideal alternative to artificial selection experiments in this regard.  
82 While the researcher largely controls fitness with artificial selection, organisms “select  
83 themselves” in an E&R experiment. Pleiotropic effects on general vigor will be a major  
84 determinant of selection on alleles with favorable trait effects in an E&R experiment, but much  
85 less so in an artificial selection experiment. Admittedly, most previous E&R experiments do not

86 evaluate the evolutionary potential of natural populations simply because they are initiated from  
87 laboratory adapted populations, or small numbers of founders. Here, we describe a replicated  
88 E&R experiment using *D. simulans* founder populations initiated with wild-caught individuals to  
89 investigate the earliest stages of adaptive evolution.

90

91 ***Genome-wide evolution in E&R studies***— E&R experiments using *Drosophila* have addressed  
92 questions about the number and kinds of loci under selection, the relative frequency of hard  
93 versus soft selective sweeps, temporal dynamics, and the effect of selection on genome-wide  
94 patterns of diversity (BURKE *et al.* 2010; TURNER *et al.* 2011a; OROZCO-TERWENGEL *et al.*  
95 2012a; REMOLINA *et al.* 2012; TURNER AND MILLER 2012b; HUANG *et al.* 2014; TOBLER *et al.*  
96 2014; KANG *et al.* 2016; BARGHI *et al.* 2017; MICHALAK *et al.* 2017; SCHOU *et al.* 2017). In a  
97 review of these studies, NUZH DIN AND TURNER (2013) noted a striking “excess of significance”  
98 in that thousands of polymorphisms appear to respond to selection. The number of loci that can  
99 be simultaneously under direct selection is an important and long-standing controversy in  
100 evolutionary genetics (HALDANE 1957; SVED *et al.* 1967; BARTON 1995). Generally however,  
101 we expect that the more loci affecting fitness, the smaller the allele frequency change per locus.  
102 It is thus paradoxical that so many SNPs exhibit large change. There are numerous potential  
103 reasons for excessive significance. Perhaps the simplest is that testing procedures might be anti-  
104 conservative if genetic drift and sampling produce greater than predicted changes.

105

106 Hitch-hiking (MAYNARD SMITH AND HAIGH 1974) is the most likely driver of excessive  
107 significance – many significant tests might be neutral SNPs in Linkage Disequilibria (LD) with  
108 selected loci. Hitch-hiking in an E&R study requires an initial association between loci in the

109 ancestral population(s) and also minimal subsequent recombination over the course of selection.  
110 Relevant to both, natural and laboratory adapted *D. melanogaster* populations are polymorphic  
111 for large inversions and have dramatically suppressed recombination near centromeres  
112 (CORBETT-DETIG AND HARTL 2012; KAPUN *et al.* 2014; TOBLER *et al.* 2014; FRANSSEN *et al.*  
113 2015a), potentially resulting in a large number of false positive candidate SNPs (TOBLER *et al.*  
114 2014; FRANSSEN *et al.* 2015a; BARGHI *et al.* 2017). We chose *D. simulans* for this study to  
115 evaluate genomic patterns underlying rapid evolution in a population largely free of inversion  
116 polymorphism. LD declines rapidly with the physical distance between sites in *D. simulans*  
117 (SIGNOR *et al.* 2018), but as emphasized by NUZH DIN AND TURNER (2013), sampling of  
118 haplotypes to form experimental populations can generate higher levels of LD (even at  
119 considerable physical distance) than are present in the natural population. The contribution of  
120 these sampling-generated associations to parallel evolution of replicate E&R populations can be  
121 mitigated by founding experimental replicates from distinct natural population samples.  
122  
123 The genomewide response in an E&R experiment (evolution at both selected and neutral loci)  
124 depends on the number and genomic positions of selected loci, how those loci interact to  
125 determine fitness, the nature and extent of LD, the recombination map, the reproductive biology,  
126 and the experimental design. Given these myriad factors, we do not have a clear picture of how  
127 much hitch-hiking is to be expected in a typical E&R experiment and thus a means to infer how  
128 many sites are direct targets of selection. To develop predictions, we build a simulation  
129 framework to predict the full observed response of an E&R experiment. The design of the  
130 experiment (how replicate populations are founded, how many individuals reproduce, and how  
131 many generations occur) is directly reiterated in a model that predicts change of every

132 polymorphism in the genome. This is a parameter rich model, but prior work on *D. simulans* and  
133 its close relative *D. melanogaster* underpin essential assumptions (e.g. the recombination map,  
134 patterns of LD in nature). Observations from our specific E&R experiment establish other  
135 features such as the number and genomic positions of polymorphisms and initial allele  
136 frequencies. Finally, we extract essential information not only from the extreme outliers  
137 (putative targets of selection), but from observations on the “average SNP.” The amount and  
138 variability of change at neutral loci dispersed across the genome is an indicator of “genetic draft”  
139 (GILLESPIE 2001; NEHER AND SHRAIMAN 2011) and thus of selection. The simulation model  
140 provides important insights on the observed experimental results, not only in terms of the  
141 number of significant tests but also on the allele frequency spectrum at fitness determining loci.

142

143

## Methods

### I. The experiment.

144 **Founding populations.** The ancestral populations of this experiment are from the offspring of  
145 wild-collected mated *D. simulans* females. We collected adult *D. simulans* from compost piles  
146 at Orchard Pond Organic Farm in Tallahassee, FL (Universal Transverse Mercator Grid  
147 coordinates 16N 761030 3386162) between October 28 and November 25, 2014. Adult females  
148 were isolated in vials to produce offspring. From each wild-collected female, we collected two  
149 male and two female offspring after verifying that male offspring were *D. simulans*. One male  
150 and one female offspring were flash frozen immediately to represent the founding generation  
151 (see below). These flies were kept at -80° until DNA extraction. The other male and female  
152 were used to found replicate lab populations. We initially established six replicate population  
153 cages, using one male and one female offspring of 250 wild-caught mated females per replicate  
154

155 and using the offspring of different wild female progenitors in each replicate. Approximately 3  
156 weeks after founding these populations (Dec 2-3, 2014), the six cages were combined two at a  
157 time to form the A, B, and C population replicates. Equal numbers of flies were used from the  
158 pair of cages and mixed to create new cages. Thus, each of the A, B, and C populations  
159 was founded with approximately 1000 individuals descended from non-overlapping sets of 500  
160 wild-caught, mated female parents.

161

162 **Lab rearing and maintenance.** Flies were housed in plexiglass containers measuring 6028  
163 cubic centimeters. Each cage was supplied with six 177-mL plastic bottles containing 50 mL of  
164 standard cornmeal-yeast-dextrose media. Every two weeks, we replaced three of the six bottles  
165 with bottles containing fresh media; each bottle remained in a cage for four weeks. We replaced  
166 cages with clean plexiglass containers every 28 days, in sync with a media change. Censuses of  
167 cages were conducted approximately every 5 weeks using digital images. Census values for  
168 each population were: A (mean=1277, range=832-1635), B (mean=849, range = 672-1147), and  
169 C (mean=1187, range=963-1620).

170

171 We maintained populations A, B, and C under constant lighting and temperature conditions  
172 (12L:12D, 25°) for approximately 195 days from initial collection (population A: founded from  
173 females collected Oct 28 – Nov 1, 2014, descendants preserved May 12, 2015; B: founders  
174 collected Nov 4-Nov 11, descendants preserved May 22; C: founders collected Nov 19-Nov 25,  
175 descendants preserved Jun 5). That is, descendants of the original founders were sampled  
176 approximately 7 months (about 14 generations) after collection of the wild founders. From the  
177 last generation of each population, we collected 500 males and 500 females by aspiration. These



178 flies were snap frozen on dry ice and kept at  $-80^{\circ}$  until DNA extraction. For DNA extraction and  
179 sequencing, we pooled the 1000 preserved offspring of the founding females to form "Ancestral"  
180 samples A0, B0, and C0. Similarly, we pooled the 1000 flies collected at the end of the  
181 experiment to form Descendant samples (A7, B7, C7), with "7" designating months since  
182 population founding. Extractions and sequencing libraries were performed simultaneously for all  
183 six population samples.

184

185 **Library prep and level of sequencing.** Whole flies (500 males and 500 females from each  
186 Ancestral and Descendant population) were homogenized and the DNA was extracted using  
187 DNAzol reagent (Thermo Fisher). We fragmented DNA using a Covaris E220 Ultrasonicator  
188 and size selected to produce insert lengths of 380-480 bp. One sequencing library was prepared  
189 for each population using the NEBNext Ultra DNA Library kit for Illumina (New England  
190 Biolabs) following manufacturers recommendations, with each population receiving a unique  
191 index. We made a distinct library from flies from Ancestral populations A0, B0, and C0 (NEB  
192 indices 13-15, respectively), and Descendant populations A7, B7, and C7 (NEB indices 16, 18,  
193 and 19 respectively). Ancestral population samples were multiplexed and sequenced in one lane,  
194 and those from the Descendant populations were multiplexed and sequenced in three additional  
195 lanes. Because one library (C7) was over-represented in the resulting data, we performed an  
196 additional sequencing run using the five remaining libraries (A0, B0, C0, A7, and B7) which  
197 were multiplexed and run on a single lane. All sequencing was conducted using an Illumina  
198 HiSeq 2500 instrument at the Translational Science Lab at Florida State University, using V3  
199 chemistry. We sequenced 150bp on each of the paired ends. In total, DNA from 6000 flies was  
200 sequenced.

201  
202 **Sequence Analysis.** We edited read pairs (fastq format) from each population sample using  
203 Scythe (<https://github.com/vsbuffalo/scythe/>) to remove adaptor contamination and then with  
204 Sickle (<https://github.com/najoshi/sickle/>) to trim low quality sequence. We used the mem  
205 function of BWA (Li and Durbin 2009) to map read pairs to version r2.02 of the *Drosophila*  
206 *simulans* reference genome, updated from the build published by HU *et al.* (2013). We used  
207 picard-tools-1.102 to eliminate PCR duplicates from the mapping files; an important step given  
208 that PCR duplicates represent pseudo-replication in bulked population samples. Prior to variant  
209 calling, we applied the RealignerTargetCreator and IndelRealigner to each population bam file.  
210 The population bams were input to Varscan v2.3.6 to call SNPs and indels. We piped the output  
211 from samtools mpileup (version 1.2) to the varscan functions mpileup2snp (for SNPs) and  
212 mpileup2indel (for indels). We obtained the read count (number of alleles) and reference allele  
213 frequency at each variant site for each sample. We suppressed indels in downstream analyses as  
214 well as all SNPs within 5bp of an indel. We also limited attention to the major chromosomes: X,  
215 2R, 2L, 3R, and 3L.

216  
217 We scored read depths within each population prior to filtering and found that the median depth  
218 at X-linked loci was very close to  $\frac{3}{4}$  the corresponding value for autosomal loci (ratio = 0.77 for  
219 Ancestral populations, 0.75 for Descendant populations). For subsequent analysis, we  
220 eliminated polymorphisms if the read depth across populations was too low for powerful tests or  
221 atypically high across samples. For inclusion of a SNP, we required at least 60 reads per  
222 population for X-linked and at least 80 for Autosomal loci. We excluded SNPs if the total read  
223 depth within Ancestral and Descendant (considered separately) was greater than the 95<sup>th</sup>

224 percentile of the corresponding depth distribution. Here, we conducted separate filtering on  
225 autosomal sites and X-linked sites as the latter have lower coverage. After filtering, 291272  
226 SNPs remained (58647, 49940, 69010, 71289, and 42386 on 2L, 2R, 3L, 3R, and X,  
227 respectively).

228

229 **Copy Number Variant Analysis.** We also performed a scan for copy number variants (CNV)  
230 using the method of SCHRIDER *et al.* (2013). Specifically, we applied an updated set of python  
231 scripts to identify reads pairs with excessively large inserts ([https://github.com/kern-](https://github.com/kern-lab/poolDiffCNV)  
232 [lab/poolDiffCNV](https://github.com/kern-lab/poolDiffCNV)). An unusually large distance between the first and second read of a read pair  
233 suggests an insertion of DNA within the reference genome relative to the sequenced molecule.  
234 We determined loci exhibiting this feature and scored reads with and without the putative  
235 insertion for each population. After correcting for differences in average read depth among  
236 populations, we identified loci with the greatest divergence between ancestral and descendant  
237 populations. Finally, we combined results across experimental replicate populations to identify  
238 the subset of these loci that exhibited parallel evolution. For putative CNVs exhibiting parallel  
239 change in the three replicate populations, we identified those that occurred within known coding  
240 or regulatory regions. We extracting the minimum and maximum chromosome position of the  
241 CNV across all three populations, and then used the GenomicRanges R package v. 1.30.1  
242 (Lawrence et al. 2013) to find genes with coding or regulatory regions that overlapped the CNV  
243 position.

244

245 **II. Analysis of evolutionary change at SNPs.**

246 **Null divergence.** The raw data for each polymorphism is twelve numbers, the counts of reads for  
247 each alternative allele in each of the six populations (A0, B0, C0, A7, B7, C7). The statistical  
248 treatment of data is based on transformed allele frequencies (FISHER AND FORD 1947; WALSH  
249 AND LYNCH 2017). If  $p_A$  and  $p_D$  are allele frequencies in Ancestral and Descendant populations,  
250 respectively, then  $x_A = 2 \sin^{-1}(\sqrt{p_A})$  and  $x_D = 2 \sin^{-1}(\sqrt{p_D})$ , with x measured in radians (the  
251 A/D subscript denotes Ancestral and Descendant, respectively). This angular transformation is  
252 useful because, to a first approximation, the variance in change owing to genetic drift and  
253 sampling is independent of the true allele frequency (FISHER AND FORD (1947), Supplemental  
254 Figure S1). As a consequence, a common test can be applied across polymorphisms despite  
255 differing initial allele frequencies (KELLY *et al.* 2013).

256

257 At a neutral SNP, divergence ( $x_D - x_A$ ) is predicted to be normally distributed with mean 0 and

258 variance equal to  $\frac{1}{2n_A} + \frac{1}{2n_D} + \frac{1}{m_A} + \frac{1}{m_D} + \frac{t}{2N_e}$ , where m = read depth at the locus after

259 sequencing, n = number of diploid individuals sampled for sequencing,  $N_e$  is the effective

260 population size, and t is the number of generations. While five of these quantities are known,  $N_e$

261 is not. Also, it may be that draft is as or more important than drift in determining the variance in

262 change of neutral SNPs. For these reasons, we fit a simpler model:  $[x_D - x_A] = v + \frac{1}{m_A} + \frac{1}{m_D}$ ,

263 where v is the ‘null variance.’ v absorbs quantities shared among SNPs within a population,

264 although it could differ between autosomes and X owing to differences in  $N_e$  (CHARLESWORTH

265 2009). With hitch-hiking, it will vary at much smaller genomic scales. We estimate v on a

266 population and chromosome specific basis using  $V_{AD}^* - V_{rd}$ .  $V_{rd}$  is the read-depth variance, the

267 average of  $(\frac{1}{m_A} + \frac{1}{m_D})$  across loci.  $V^*_{AD}$  is the robust estimator for the variance in divergence

268 between A and D based on the interquartile range of the full distribution (KELLY *et al.* 2013).

269 For estimation of  $v$ , we focus on SNPs with  $0.05 < p_A < 0.95$  to eliminate boundary effects.

270

271 **Testing for parallel divergence.** Divergence between ancestral and descendant populations is

272 statistically independent between replicates because each population was founded from distinct

273 flies and there was no gene flow between replicates. Under the null hypothesis,  $E[x_A - x_D] = 0$

274 and the variance is given by  $v$ ,  $m_A$ , and  $m_D$ . The likelihood for the null model at each SNP ( $LL_0$ )

275 is the product of three normal densities. We contrast the normal density likelihood of the data

276 under this model to an alternative allowing parallel evolution across replicates:  $E[x_D - x_A] = \delta$ ,

277 where  $\delta$  is the (shared) change in allele frequency due to selection across replicate populations.

278 For the alternative model, we also require the MLE of  $\mathcal{D} : \hat{\delta} = \frac{w_A dx_A + w_B dx_B + w_C dx_C}{w_A + w_B + w_C}$  where

279 the  $dx$  terms are the observed  $(x_A - x_D)$  in each replicate and the  $w$  are replicate specific

280 weights:  $w = \frac{1}{v + \frac{1}{m_A} + \frac{1}{m_D}}$  (see MONNAHAN AND KELLY (2017) for derivation). The Likelihood

281 Ratio Test (LRT) for parallel evolution is  $2(LL_1 - LL_0)$ . This is not a strict likelihood in the sense

282 that  $v$  are treated as constants and not free parameters, but the error associated with this

283 procedure should be minimal given that  $v$  are estimated from the aggregate of thousands of

284 variant sites (MONNAHAN AND KELLY 2017). Also, we use permutation (and not the parametric

285 chi-square distribution) to assess genome-wide significance of LRT values. To create a

286 permutation replicate, we randomly scrambled observed standardized divergences across SNPs

287 within each replicate population and then applied the LRT test to each SNP. The distribution of

288 divergences (across SNPs within each population) is preserved by this procedure and so the test  
289 is based entirely on consistency of response of the same SNP across replicates. We extracted the  
290 most extreme (largest) LRT from each permuted dataset and repeated the procedure 1000 times.  
291  
292 We applied a second scan for parallel adaptation at the scale of genomic windows. The LRT  
293 described above requires the same SNP to show a strong parallel response. This may miss  
294 selected sites because allele frequency estimates are encumbered with substantial error owing to  
295 finite sequencing depth. Closely linked sites might all respond to selection (owing to hitch-  
296 hiking) but show differing signals across replicate populations owing to differing estimation  
297 error. To capture signals of parallel evolution in genomic windows, we compared the rank order  
298 of divergence in windows, using the rank-rank hypergeometric (RRHO) approach of PLAISIER *et*  
299 *al.* (2010). This method has been used to compare ranked lists from gene expression (TELES *et*  
300 *al.* 2013; PENA *et al.* 2017) and genome-wide association studies (MEDLAND *et al.* 2014; FRANKE  
301 *et al.* 2016). Here we used this rank-based approach to identify genomic regions characterized by  
302 high divergence in all replicate populations, but where the actual sites of highest divergence  
303 might differ among populations. We first identified, within each replicate, the site in each  
304 window with the maximum absolute value of divergence between ancestor and descendant. We  
305 assigned that maximum value to the window. We excluded regions near centromeres and  
306 telomeres to remove regions likely to have low recombination (regions retained: 2L:2,400,000-  
307 19,600,000; 2R:24,000,000-200,000,000; 3L:2,400,000-21,000,000 ; 3R:24,000,000-25,000000 ,  
308 X:2,000,000-19,600,000). We then ranked these maximum divergence values, with windows  
309 exhibiting the greatest decrease in the reference allele frequency during laboratory adaptation at  
310 the top of the ranked list and those with the greatest increase in reference allele frequency at the

311 bottom. The rank order of windows in populations A, B, and C were then compared by  
312 evaluating overlap in ranks at many different thresholds. For example, the overlap of the top 100  
313 windows in two populations was compared, then the overlap in the top 200 windows, and so on,  
314 until every possible combination of thresholds was evaluated. The hypergeometric probability of  
315 the number of overlapping items was calculated for every threshold, applying the BENJAMINI  
316 AND YEKUTIELI (2001) correction for multiple tests. We conducted this analysis at three different  
317 window sizes (100-kb, 10-kb, and 1-kb) to assess our expectation that effects of hitch-hiking  
318 would be minimal at the largest window size and more pronounced as window size decreased.

319

### 320 **III. The Simulator.**

321 The program tracks each chromosome of each individual in the population as a series of binary  
322 values (the allele present at each locus). The number and position of each locus is given by the  
323 number/position of each polymorphism observed in the experiment. To optimize use of computer  
324 memory, the program compresses sites following SUKUMARAN AND HOLDER (2011). The  
325 population is defined as  $N_m$  male and  $N_f$  female adults that are formed each generation (only one  
326 X in males). Generation zero is founded by selecting haplotypes from the “natural population”  
327 using observed Ancestral allele frequencies combined with hash tables to accommodate LD (see  
328 Supplemental Table S1). The hash tables were estimated using the large collection of *D.*  
329 *simulans* genomes recently published by SIGNOR *et al.* (2018) and account for LD differences  
330 between low recombination regions (near centromeres and telomeres) and between the X and  
331 autosomes.

332

333 Each subsequent generation is formed by randomly selecting parents and synthesizing gametes  
334 from those parents to create a new set of  $N_m$  males and  $N_f$  females. We assume no  
335 recombination in males. In females, recombination probabilities per chromosome arm are  
336 specified as 2L: 0.570, 2R: 0.655, 3L: 0.555, 3R: 0.830, and X: 0.590 following TRUE *et al.*  
337 (1996). The location of crossovers, when they occur, is probabilistic. We use the location  
338 distribution from *D. melanogaster* (COMERON *et al.* (2012); Supplemental Table S3) which  
339 exhibits reduced rates near telomeres and centromeres.

340

341 In simulations with selection, individuals are chosen with probabilities proportional to their  
342 fitness (which is a function of the genotype at relevant sites). We first consider a truncation  
343 selection model – individuals have fitness 1 if their genotypic score (a simple sum of effects  
344 across loci) exceeds the threshold and 0 otherwise. We second consider a multiplicative model  
345 where each site affecting fitness has a selection coefficient ( $s$ ) with 1,  $1+s$ ,  $1+2s$ , as the locus  
346 specific fitness values. Individual fitness (the relative probability of selection for reproduction)  
347 is a product across loci. For both selection models, we assume that hemizygous male genotypes  
348 have the “homozygous” effect, e.g. 1 and  $1+2s$ .

349

350 A simulation replicate is three distinct populations propagated for 14 generations. In each  
351 population, we simulate data collection (sequencing) to mimic the actual experiment. Read  
352 depths at each polymorphic site are equivalent to the observed values. We then subject the  
353 simulated data to the same analysis pipeline applied to the real data (estimation of null variance  
354 parameters followed by LRT tests on all sites). For each parameter set (specified values for  $N_m$



355 and  $N_f$ , the number and location of selected sites, selection coefficients at each site), we simulate  
356 the entire experiment 1000 times to determine the range of outcomes.

357

## 358 **Results**

359

360 Divergence of transformed allele frequency is highly normal and changes in transformed allele  
361 frequencies are essentially homoscedastic (Supplemental Figure S1), which justifies use of the  
362 angular transform (FISHER AND FORD 1947) . However, the null variance in divergence ( $v$ ) varies  
363 substantially among chromosomes and populations (Table 1). If the average  $v = 0.0183$  is  
364 equated to its expected value under neutral genetic drift ( $\frac{1}{2n_A} + \frac{1}{2n_D} + \frac{t}{2N_e}$ ), we obtain  $N_e = 405$ ,  
365 which is much lower than adult census sizes (ca. 1000 flies). Also, the variance in  $v$  among  
366 chromosomes and populations is much greater than predicted by neutral drift dynamics (see  
367 simulation results below).

368

369 Against the background distribution, 126 polymorphisms provide strong evidence for parallel  
370 adaption in captivity (Supplemental Table S2). The LRT value for these SNPs is larger than the  
371 most extreme single test in 95% of the permuted datasets (LRT cutoff = 46.64 yields permutation  
372  $p < 0.05$ ; Supplemental Table S4). Importantly, these sites do not all represent distinct  
373 “evolutionary events” given that significant variants are often closely linked. Figure 1 illustrates  
374 the largest LRT value per 100kb window along each chromosome. There is clearly an  
375 aggregation of strong signal in regions of low recombination. The clumping of LRT in these  
376 regions nicely parallels the pattern of high LD among distant sites (Supplemental Figure S3).

377 If we “bin” significant tests that are relatively closely linked, then perhaps 20-30 distinct “loci”  
378 are evident as foci of selection across the genome. The striking feature of selected variants is  
379 that nearly all are loci where the two alleles segregate at intermediate frequencies in the natural  
380 population (Figure 2). The overall allele frequency spectrum (AFS) in the ancestral population  
381 (blue bars) is typical of natural population samples of *D. simulans* (SIGNOR *et al.* 2018). Less  
382 than half of SNPs have a minor allele frequency (MAF) greater than 0.1. However, among SNPs  
383 testing positive for parallel selection (orange bars), 98% have  $MAF > 0.1$  in the ancestral  
384 population and 88% have  $MAF > 0.2$ .

385  
386 Rank-based analysis of divergence of genomic windows shows high similarity between  
387 populations, even after excluding regions of low recombination. Using 100-kb windows, 903  
388 windows remained after removing centromeric and telomeric regions. At this window size, we  
389 expect effects of hitch-hiking to be limited (see Figure 1 where, outside of centromeric and  
390 telomeric regions, high LRT regions tend not to be clumped). Nevertheless, the ranks of  
391 windows with respect to their maximum divergence value was more similar than expected by  
392 chance. In the heat maps in Figure 3, a pattern of warm colors (small probability values) in cells  
393 in the upper-right and lower-left quadrats indicates that more windows were ranked similarly in  
394 both populations than expected by chance (Plaisier *et al.* 2010). Especially for windows showing  
395 most extreme divergence (top right and bottom left corners of heat maps), the overlap in rankings  
396 is associated with probability values below  $10^{-10}$ , after correction for multiple hypergeometric  
397 tests. At this window size, similarity in ranks for windows in which the reference allele increased  
398 in frequency during laboratory adaptation is especially apparent (upper right quadrat). One  
399 quarter to one third of all genomic windows exhibited parallel divergence in this direction in all

400 pairwise comparisons between populations ( $p$  values  $< 10^{-15}$ ). Using smaller windows (1 kb and  
401 10 kb), replicate populations exhibited even more similar ranks, indicated by very low  
402 probabilities at most overlap thresholds (Supplemental Figure S2).

403

404 We identified 303 putative CNV that evolved in parallel in the three replicate populations. These  
405 regions overlapped known coding and/or regulatory regions of 396 *D. simulans* genes  
406 (Supplemental Table S5). Few *D simulans* genes have been annotated with functional  
407 information, so we obtained *D. melanogaster* orthologs for the 311 genes for which the orthologs  
408 are known (downloaded from Flybase Release 2018\_02, on May 9, 2018). Among these were  
409 orthologs of genes involved in metamorphosis (*neverland*), circadian rhythm and sleep (*Ac3*,  
410 *Nipped-B*), stress response (*mth*), immunity (*PGRP-SC1a*, *Trx-2*), sensory perception (odorant  
411 receptors *Or42a*, *Or13a*), and chromatin modification (*gpp*, *brm*, *Nipped-A*, and *CG12659*) (see  
412 Supplemental Table S5 for complete list of orthologs and functional annotation).

413

414 **Simulation results.** We evaluated a series of parameter sets against four distinct aspects of the  
415 observed results. First, how well do simulation outcomes match the observed mean and  
416 variability in the null variance ( $v$ ) across chromosomes and replicate populations (comparison to  
417 Table 1)? Second, do simulations yield a comparable number of significant LRT tests for  
418 parallel evolution (comparison to Supplemental Table S2)? Third, are significant tests  
419 distributed across the genome in a way similar to the real data (comparison to Figure 1)? Fourth,  
420 is the allele frequency distribution of significant loci similar to Figure 2?

421

422 Strictly neutral evolution using the census population sizes for adults ( $N_m = 500$ ,  $N_f = 500$ ) fails  
423 to match the observed evolutionary response in all regards. The mean  $\nu$  for simulated data is less  
424 than half the observed mean (Supplemental Table S6.A) and exhibits higher values for the X  
425 than autosomes (not observed in Table 1). In the simulations, the standard deviation across  
426 chromosomes and population replicates in simulations is less than 1/5 the observed value.  
427 Thirty-seven of 1000 simulations of the experiment produced an LRT value that exceeded our  
428 threshold for the real data (46.64) which suggests the test is slightly conservative (null  
429 expectation is 50 of 1000). Also, the distribution for individual LRT tests (within and across  
430 simulations) closely matches the parametric expectation. With neutral evolution, the LRT should  
431 follow a chi-square distribution with 1 degree of freedom.

432

433 If we simulate neutral evolution but reduce adult population sizes ( $N_m = N_f = 210$ ), the mean  $\nu$  of  
434 autosomes is close to observed, but the simulated mean for the X is too high (0.23) and the  
435 variance among chromosomes too low (Supplemental Tables S6.B). The X versus autosome  
436 discrepancy for mean  $\nu$  can be addressed introducing a large sex ratio bias. If we simulate neutral  
437 evolution with  $N_m = 120$  (much lower than census) and  $N_f = 800$  (much higher than census), the  
438 simulation mean  $\nu$  is 0.17 for autosomes and 0.18 for X (Supplemental Tables S6.C). These are  
439 reasonable given Table 1. However, the variance in  $\nu$  from these simulations remains too low  
440 relative to observed. Most importantly, the neutral simulations never yield many high LRT tests  
441 for parallel selection. There are 895 tests with  $LRT > 20$  in real data versus an average of 3-5 in  
442 neutral simulations.

443

444 There is an enormous range of possibilities for simulations with selection. We have considered  
445 variations on the number of loci affecting fitness, the magnitude and direction of their respective  
446 effects, the chromosomal locations of these loci, and how different loci combine to determine  
447 fitness. Here, we will limit attention to a few specific cases that predict the general features of  
448 the observed evolutionary response in the experiment. Figure 4 illustrates four simulation  
449 replicates for evolution on chromosome 2 (comparable in content to the top panel of Figure 1).  
450 This is a case where 20 loci influence fitness, 4 positioned uniformly over each chromosome arm  
451 (8 sites across 2L and 2R are shown in Figure 4). In each replicate, the initial allele frequencies  
452 at fitness determining sites were sampled from the observed distribution for significant sites  
453 (orange bars in Figure 2). Each locus contributes equally and additively to the genotypic score  
454 subject to truncation selection. With the top 75% selected each generation (375 males and 375  
455 females), the mean and standard deviation of  $v$  are close to their observed values (0.018 and  
456 0.0022, respectively; Supplemental Table S6.D). The number of large LRT tests for parallel  
457 selection is less than observed. Genomewide, an average of 320 sites yield an LRT greater than  
458 20 (895 in the real data). However, some simulation replicates yield LRT distributions that  
459 closely match the observed. Moreover, plots of maximum LRT test per 100kb (Figure 4)  
460 reiterate key features of the observed data. In particular, most replicates demonstrate the  
461 aggregation of strong signal in regions of low recombination. The hitch-hiking effect is variable  
462 among replicates (since initial allele frequencies at selected sites and natural LD patterns with  
463 those sites are resampled with each replicate), but can be as pronounced as in the real data  
464 (Figure 1). Since the fitness-determining loci do not always yield high LRT (and if they did,  
465 would *directly* produce only 20 high LRTs), the simulations clearly show how hitch-hiking can  
466 reiterate the abundance of significant tests noted by NUZHIDIN AND TURNER (2013).

467

468 We manipulated the initial distribution of allele frequencies at selected sites to address the  
469 question that emerges from Figure 2: Does the intermediate frequency of significant variants  
470 from the experiment (orange bars in Figure 2) imply that intermediate frequency variants are the  
471 primary targets of selection in the laboratory environment? We conducted otherwise equivalent  
472 simulations but with initial allele frequencies of selected sites sampled from the genome-wide  
473 distribution (blue bars in Figure 2; Supplemental Table S6.E). As previously, the minor allele  
474 was equally likely to increase or decrease genotypic score. The broken lines (green) in Figure 2  
475 illustrate the AFS of sites in simulation experiments with LRT exceeding the genome-wide  
476 threshold from the real experiment. There is a “pull to the middle” in these simulations; most  
477 selected sites have a  $MAF < 0.1$ , but those with higher initial frequencies are more likely to yield  
478 high LRT (Figure 2). However, despite this ascertainment effect (among selected sites, those  
479 with more intermediate frequency are more likely to be detected), the real data contain an excess  
480 of SNPs with  $MAF > 0.3$  that yield significant tests (orange versus green in Figure 3). Also  
481 relevant is that the pull to the middle in simulations with selection from the background AFS  
482 reflects a biologically important feature – the loci with higher MAF are generating greater  
483 variance in fitness when the population experiences the novel laboratory environment.

484

485 The 20-locus model is only one of a great many that might predict the general features of the  
486 observed response, but it is instructive as a basis for comparison. For example, if we increase the  
487 strength of selection (50% of adults instead of 75% reproducing), but maintain all else the same,  
488 the draft effect becomes excessive relative to the data (Supplemental Table S6.F). In these  
489 simulations, the mean  $v$  is 4 times greater than observed and the standard deviation of  $v$  is

490 inflated 13 fold. If we maintain 75% selected but allow 30 loci to affect fitness (6 per  
491 chromosome arm), the mean and standard deviation of  $v$  are very similar to the 20-locus model,  
492 and thus close to the real data. However, the number of high LRT tests is reduced because  
493 selection *per locus* is weaker and thus so is the magnitude of allele frequency change. If we  
494 replace truncation selection with multiplicative selection with  $s = 0.1$  at each of the 20 loci, the  
495 simulations yield approximately the observed value for mean  $v$ . However, the standard deviation  
496 for  $v$  is too large by 60% and the number of high LRT scores is reduced by about a third relative  
497 to the base case (Supplemental Table S6.G). In general, we see that truncation selection allows a  
498 more pronounced parallel response than multiplicative selection for a given level of draft (for  
499 similar values of the mean and standard deviation of  $v$ ).

500

## 501 **Discussion**

502

503 This E&R experiment, while short in duration, yielded a pronounced evolutionary response.  
504 Over a 100 SNPs, clustered into perhaps 20-30 distinct loci across the genome, exhibit parallel  
505 change. The allele frequency spectrum (AFS) of selected sites is strongly biased toward  
506 intermediate allele frequencies and it is clear that the source natural population harbors abundant  
507 standing variation, allowing rapid adaptation in a novel environment. Accumulating examples of  
508 rapid phenotypic and genomic evolution and observations that allele frequencies can vary  
509 cyclically in natural *Drosophila* populations (Bergland et al. 2014) have led to the suggestion that  
510 many of the foundational principles of molecular population genetics, based on neutral and  
511 nearly-neutral theory, might require revision (Messer et al. 2016; Hermisson et al. 2017). Our  
512 study provides evidence that with genome wide selection in a novel environment, genetic draft is

513 more important than genetic drift. We could not find a neutral model that accurately predicts the  
514 evolution of the “average SNP” (the determinants of  $v$ ); the many polymorphisms that were  
515 neutral or nearly so in this experiment. Below, we discuss these results in relation to the  
516 maintenance of polymorphisms in nature and the paradox of excessive significance in E&R  
517 studies.

518

519 ***Hitch-hiking and excessive significance***—NUZHIDIN AND TURNER (2013) argue that the large  
520 number of significant tests in recent E&R experiments, e.g. (TURNER *et al.* 2011b; OROZCO-  
521 TERWENGEL *et al.* 2012b; TURNER AND MILLER 2012a), must be due to over-estimating the  
522 number of loci under selection. Because a limited number of haplotypes are sampled to initiate  
523 E&R experiments, non-random associations between loci can be generated even at loci far apart  
524 in the genome. This sampling effect, combined with traditional hitch-hiking, could produce  
525 large changes in allele frequency at many sites that are not the direct targets of selection. For the  
526 present experiment, we established each replicate population with a distinct sampling of  
527 genotypes from nature, which should reduce the scope for haplotype-sampled LD to generate  
528 false positives. The finite number of haplotypes that survive in each experimental population  
529 will yield idiosyncratic associations between distant SNPs, but these associations should be  
530 population specific. Hitch-hiking may produce strong correlated responses at neutral  
531 polymorphisms, but it is less likely to generate consistent *parallel* changes across replicates.  
532 Perhaps for these reasons, the number of significantly diverged SNPs in this experiment is  
533 reduced by an order of magnitude from previous studies (from thousands to 126).

534



535 Another potential reason we observed a low number of significant SNPs relative to other E&R  
536 experiments is the nature of the *D. simulans* genome. Inversions are rare in *D. simulans*  
537 (Lemeunier and Aulard 1992), recombination suppression near centromeres is less pronounced  
538 than in *D. melanogaster* and the genome-wide recombination rate is 30% higher than in *D.*  
539 *melanogaster* (True et al. 1996). In a recent investigation comparing genomic change in *D.*  
540 *melanogaster* and *D. simulans* after ~60 generations of adaptation to hot conditions in a  
541 laboratory environment, patterns were substantially different in the two species (Barghi et al.  
542 2017). *D. simulans* had fewer candidate SNPs, and the regions of the genome implicated in  
543 response to selection were narrower and more distinct. Strikingly, almost all of chromosome  
544 arm 3R in *D. melanogaster* (which contains several overlapping segregating inversions)  
545 exhibited a pattern consistent with selection. In *D. simulans*, which lacks similar inversions on  
546 3R, several narrow, distinct regions on this chromosome arm exhibited such a pattern. The  
547 authors attributed many of these differences in the frequency of segregating inversions and in  
548 centromeric recombination suppression.

549  
550 Figure 1 suggests there are 20-30 major loci responding to parallel selection with several linked  
551 SNPs per locus generating significant LRT tests. However, there might be a much larger number  
552 of loci that responded in parallel, but that failed to reach the conservative threshold we used in  
553 our SNP-specific LRT tests. Some support for this possibility is provided by the rank-based  
554 analyses of genomic windows. Even at the largest window size (100 kb), where hitch-hiking  
555 effects should be minimal, several hundred windows exhibited parallel patterns of divergence,  
556 suggesting that more than 20 loci responded in parallel in this experiment. If sampling variation  
557 led to variation among populations in the individual SNPs that produced strong signals of

558 divergence at loci undergoing parallel evolution, those loci would not be detected in our SNP-  
559 based analyses, but would be detected in the window-based analyses. Alternately, haplotype  
560 sampling could produce an inflated signal of parallel evolution in these window-based tests, but  
561 as argued above, using independent founders in different replicate populations should mitigate  
562 that sampling effect.

563

564 Among our genome-wide significant SNPs (Supplemental Table S2), we cannot distinguish the  
565 actual targets of selection from hitch-hikers. While this is a clear limitation of the experiment,  
566 the intermediate frequency result (Figure 2) is not undermined by hitch-hiking. Change at a  
567 hitch-hiking locus will only match change at the selected locus if allelic association is maximal  
568 (and remains unbroken by recombination) and allele frequencies are similar at the two  
569 loci. Imagine a rare allele that is exclusively associated with one of the two alleles at a neutral,  
570 intermediate frequency polymorphism. If the rare allele at locus A (A') becomes favorable, the  
571 change of the hitch-hiking allele (B') will likely be much smaller than for A' because most  
572 copies of B' are initially linked to the deleterious A allele. While the loci of this example are  
573 perfectly associated in one sense (maximal value for Lewontin's  $D'$  (LEWONTIN 1964)),  $r^2$  is  
574 quite low, and  $r^2$  better predicts the magnitude of correlated change. Of course, favorable rare  
575 alleles can cause extensive hitch-hiking by other rare alleles when captured in the same founding  
576 haplotype (see FRANSEN *et al.* (2015b) for an illustration of this effect).

577

578 ***Environmental heterogeneity and the maintenance of polymorphism***—We have emphasized  
579 that the lab environment is novel and thus a selective challenge to wild *D. simulans*. However,  
580 the lab environment is also relatively constant and homogeneous. The experiment thus tests

581 whether maintaining a genetically diverse population in a constant environment leads to  
582 predictable changes in allele frequency. Polymorphisms maintained by environmental  
583 heterogeneity should not be stable if heterogeneity is eliminated. If there is heterogeneity in the  
584 natural environment (e.g., seasonal variation in temperature or spatial structure in resource  
585 availability) and if genotypes vary in their optima for these variables, then variation is  
586 maintained as a ‘multi-niche polymorphism’ (LEVENE 1953). At such loci, we cannot predict  
587 which allele would increase in captivity without detailed information about genotype-specific  
588 tolerances. However, it is likely that one genotype will accidentally match the lab environment  
589 better than alternatives, and as a consequence, a multi-niche polymorphism will break down if  
590 the population is maintained in a single niche. Relevant to this expectation, we observed that  
591 expected heterozygosity,  $2p(1-p)$ , declined at over 75% of the sites significant for parallel  
592 evolution (Supplemental Table S2). While dramatic evolution is routinely observed in captive  
593 and/or domesticated populations (DRISCOLL *et al.* 2009; TRUT *et al.* 2009; MEYER AND  
594 PURUGGANAN 2013), it is usually impossible to distinguish adaptive changes (to the specific  
595 laboratory environment) from those owing to genetic drift and inbreeding or directed (artificial)  
596 selection.

597

598 We hypothesize that the polymorphisms significant for parallel selection are likely maintained by  
599 balancing selection of some form (including but not limited to environmental heterogeneity) in  
600 nature (BERGLAND *et al.* 2014; CHARLESWORTH 2015). The AFS at significant loci is strikingly  
601 different from the genomic background. The overall AFS (blue bars in Figure 2) exhibits the  
602 expected preponderance of rare alleles (MORIYAMA AND POWELL 1996; PRZEWORSKI *et al.*  
603 2001), consistent with the idea that most polymorphisms are neutral or nearly neutral (WRIGHT

604 1931; OHTA 1976). However, the polymorphisms that responded to selection are  
605 overwhelmingly intermediate frequency (orange bars in Figure 2). If selection were consistently  
606 favoring one of the two alleles at these loci in the natural population, it is extremely unlikely that  
607 the minor allele would persist at frequencies greater than 20%. Of course, neutral alleles can  
608 sometimes drift to intermediate frequencies. However, the fact that these polymorphisms have  
609 clear phenotypic effects (implied by rapid evolution in the lab) undermines the argument that  
610 they are neutral in nature.

611  
612 Ascertainment and cause are two important considerations for interpreting the AFS of significant  
613 sites. Regarding ascertainment, the question is whether the excess of intermediate frequency  
614 polymorphisms among selected loci is because it is easier to detect change at these loci. For the  
615 great majority of polymorphisms, the answer is clearly no. In terms of transformed allele  
616 frequency (on which testing is based), the average magnitude of change is as large for rare alleles  
617 as for common (Supplemental Figure S1). The angular transformation effectively normalizes the  
618 effects of genetic drift and experimental sampling on allele frequency change (FISHER AND FORD  
619 1947). However, it does not eliminate dependency of selection-driven change on allele  
620 frequency. For a given selection coefficient, the variance in fitness generated by a locus is  
621 maximal at intermediate allele frequency. The difference between blue and green in Figure 2  
622 illustrates that we are more likely to detect intermediate frequency alleles because they  
623 experience greater change. This reflects the simple fact that loci with more intermediate allele  
624 frequencies generate greater variance in fitness, all else equal. However, despite this  
625 ascertainment effect, there is still an excess of SNPs with significant tests with  $MAF > 0.3$  in the  
626 real data (orange versus green in Figure 3).

627  
628 Rapid evolution in a uniform environment may suggest a role for environmental heterogeneity,  
629 but the experiment does not identify the most important aspects of heterogeneity. Many  
630 selective agents are consistent with the results. For example, consider a polymorphism that is  
631 maintained by spatial or temporal variation in natural enemies (pathogens or predators). One  
632 allele confers resistance but at metabolic expense. This allele is favored when  
633 predators/pathogens are abundant but disfavored in their absence. In the captive environment,  
634 the natural enemy is absent and the low-defense allele is now under positive directional  
635 selection. Now consider a different sort of antagonistic pleiotropy; a polymorphism maintained  
636 by a life-history tradeoff where one allele has high viability at the expense of lower fecundity. If  
637 we eliminate the agents of viability selection in the lab, such that nearly everyone survives, the  
638 high-fecundity allele will now be under positive directional selection. Frequency-dependent  
639 selection arising from competitive or social interactions (ANTONOVICS AND KAREIVA 1988) can  
640 also maintain polymorphism that the lab environment could remove or reduce. While these  
641 examples are varied in terms of the proximate causes of fitness variation, all involve trade-offs  
642 present in nature that are eliminated in the laboratory environment.

643  
644 **Summary**—Predicting evolutionary response to a changing environment, and its genetic basis, is  
645 one of the major goals of modern evolutionary genetics. However, recent genome-wide analyses  
646 of evolution occurring in real time have failed to identify the targets of selection. Here we find  
647 that both hitch-hiking and haplotype sampling effects are likely to lead to large over-estimation  
648 of the number of sites that respond to selection in evolve-and-resequence studies. We also  
649 propose new analytical and simulation approaches that mitigate this over-estimation. These

650 methods allow us to infer that loci that responded in parallel to a novel environment were  
651 predominantly those maintained at intermediate frequency in the ancestral wild population. Even  
652 so, these techniques do not allow us to distinguish the actual targets of selection from hitch-  
653 hikers.

654

655 **Acknowledgments:** We thank R. Unckless, S. Macdonald, D. Houle, and J. Sztepanacz for input  
656 on the project and/or manuscript. We thank Christopher Souders and Lauren Reynolds for lab  
657 work and the KU ACF for computing support. **Funding:** This work was supported by grants  
658 from the National Institutes of Health to J.K. (R01 GM073990) and NSF (IOS 1257735 and  
659 DEB 1740466) to K.H.

660

## Literature Cited

661

- 662 Antonovics, J., and P. Kareiva, 1988 Frequency-dependent selection and competition - empirical  
663 approaches. *Phil. Trans. Roy. Soc. Lond. B* 319: 601-613.
- 664 Barghi, N., R. Tobler, V. Nolte and C. Schlotterer, 2017 *Drosophila simulans*: A Species with  
665 Improved Resolution in Evolve and Resequencing Studies. *G3 (Bethesda)* 7: 2337-2343.
- 666 Barrick, J. E., D. S. Yu, S. H. Yoon, H. Jeong, T. K. Oh *et al.*, 2009 Genome evolution and  
667 adaptation in a long-term experiment with *Escherichia coli*. *Nature* 461: 1243-U1274.
- 668 Barton, N. H., 1995 Linkage and the Limits to Natural-Selection. *Genetics* 140: 821-841.
- 669 Benjamini, Y., and D. Yekutieli, 2001 The control of the false discovery rate in multiple testing  
670 under dependency. *Annals of Statistics* 29: 1165-1188.
- 671 Bergland, A. O., E. L. Behrman, K. R. O'Brien, P. S. Schmidt and D. A. Petrov, 2014 Genomic  
672 Evidence of Rapid and Stable Adaptive Oscillations over Seasonal Time Scales in  
673 *Drosophila*. *PLOS Genetics* 10: e1004775.
- 674 Burke, M. K., J. P. Dunham, P. Shahrestani, K. R. Thornton, M. R. Rose *et al.*, 2010 Genome-  
675 wide analysis of a long-term evolution experiment with *Drosophila*. *Nature* 467: 587-  
676 U111.
- 677 Charlesworth, B., 2009 Effective population size and patterns of molecular evolution and  
678 variation. *Nat Rev Genet* 10: 195-205.
- 679 Charlesworth, B., 2015 Causes of natural variation in fitness: Evidence from studies of  
680 *Drosophila* populations. *Proceedings of the National Academy of Sciences* 112: 1662-  
681 1669.
- 682 Comeron, J. M., R. Ratnappan and S. Bailin, 2012 The Many Landscapes of Recombination in  
683 *Drosophila melanogaster*. *PLOS Genetics* 8: e1002905.
- 684 Conover, D. O., and S. B. Munch, 2002 Sustaining fisheries yields over evolutionary time scales.  
685 *Science* 297: 94-96.
- 686 Corbett-Detig, R. B., and D. L. Hartl, 2012 Population genomics of inversion polymorphisms in  
687 *Drosophila melanogaster*. *PLoS Genet* 8: e1003056.
- 688 Daborn, P. J., J. L. Yen, M. R. Bogwitz, G. Le Goff, E. Feil *et al.*, 2002 A single p450 allele  
689 associated with insecticide resistance in *Drosophila*. *Science* 297: 2253-2256.
- 690 Darimont, C. T., S. M. Carlson, M. T. Kinnison, P. C. Paquet, T. E. Reimchen *et al.*, 2009  
691 Human predators outpace other agents of trait change in the wild. *Proceedings of the*  
692 *National Academy of Sciences of the United States of America* 106: 952-954.
- 693 Driscoll, C. A., D. W. Macdonald and S. J. O'Brien, 2009 From wild animals to domestic pets,  
694 an evolutionary view of domestication. *Proceedings of the National Academy of Sciences*  
695 106: 9971-9978.
- 696 Ellner, S. P., M. A. Geber and N. G. Hairston, Jr., 2011 Does rapid evolution matter? Measuring  
697 the rate of contemporary evolution and its impacts on ecological dynamics. *Ecol Lett* 14:  
698 603-614.
- 699 Ellner, S. P., N. G. Hairston, Jr., C. M. Kearns and D. Babai, 1999 The roles of fluctuating  
700 selection and long-term diapause in microevolution of diapause timing in a freshwater  
701 copepod. *Evolution* 53: 111-122.
- 702 Fisher, R. A., and E. B. Ford, 1947 The spread of a gene in natural conditions in a colony of the  
703 moth *Panaxia dominula*. *Heredity* 1: 143-174.

- 704 Ford, E. B., 1964 *Ecological Genetics*. Methuen and Company, London, UK.
- 705 Franke, B., J. L. Stein, S. Ripke, V. Anttila, D. P. Hibar *et al.*, 2016 Genetic influences on  
706 schizophrenia and subcortical brain volumes: large-scale proof of concept. *Nat Neurosci*  
707 19: 420-431.
- 708 Franks, S. J., and A. E. Weis, 2008 A change in climate causes rapid evolution of multiple life-  
709 history traits and their interactions in an annual plant. *Journal of Evolutionary Biology*  
710 21: 1321-1334.
- 711 Franssen, S. U., V. Nolte, R. Tobler and C. Schlotterer, 2015a Patterns of linkage disequilibrium  
712 and long range hitchhiking in evolving experimental *Drosophila melanogaster*  
713 populations. *Mol Biol Evol* 32: 495-509.
- 714 Franssen, S. U., V. Nolte, R. Tobler and C. Schlotterer, 2015b Patterns of Linkage  
715 Disequilibrium and Long Range Hitchhiking in Evolving Experimental *Drosophila*  
716 *melanogaster* Populations. *Molecular Biology and Evolution* 32: 495-509.
- 717 Ghalambor, C. K., K. Hoke, E. Ruell, E. K. Fisher, D. N. reznick *et al.*, 2015 Non-adaptive  
718 plasticity and rapid adaptive evolution of the guppy transcriptome. *Nature* 525: 372–375.
- 719 Gillespie, J. H., 1991 *The Causes of Molecular Evolution*. Oxford University Press, Oxford.
- 720 Gillespie, J. H., 2001 IS THE POPULATION SIZE OF A SPECIES RELEVANT TO ITS  
721 EVOLUTION? *Evolution* 55: 2161-2169.
- 722 Grant, P. R., 1999 *Ecology and Evolution of Darwin's Finches*. Princeton University Press,  
723 Princeton, N.J.
- 724 Hairston, N. G., S. P. Ellner, M. A. Geber, T. Yoshida and J. A. Fox, 2005 Rapid evolution and  
725 the convergence of ecological and evolutionary time. *Ecology Letters* 8: 1114-1127.
- 726 Hairston, N. G., and W. E. Walton, 1986 Rapid evolution of a life history trait. *Proc Natl Acad*  
727 *Sci U S A* 83: 4831-4833.
- 728 Haldane, J. B. S., 1957 The cost of natural selection. *J. Genet.* 55: 511-524.
- 729 Hendry, A. P., and M. T. Kinnison, 1999 Perspective: The pace of modern life: Measuring rates  
730 of contemporary microevolution. *Evolution* 53: 1637-1653.
- 731 Hu, T. T., M. B. Eisen, K. R. Thornton and P. Andolfatto, 2013 A second-generation assembly  
732 of the *Drosophila simulans* genome provides new insights into patterns of lineage-  
733 specific divergence. *Genome Research* 23: 89-98.
- 734 Huang, Y., and A. F. Agrawal, 2016 Experimental evolution of gene expression and plasticity in  
735 alternative selective regimes. *PLoS Genet* 12: e1006336.
- 736 Huang, Y., S. I. Wright and A. F. Agrawal, 2014 Genome-wide patterns of genetic variation  
737 within and among alternative selective regimes. *PLoS Genet* 10: e1004527.
- 738 Jain, K., and W. Stephan, 2017 Rapid adaptation of a polygenic trait after a sudden  
739 environmental shift. *Genetics* 206: 389-406.
- 740 Johnston, R. F., and R. K. Selander, 1964 House sparrows: rapid evolution of races in North  
741 America. *Science* 144: 548-550.
- 742 Kang, L., D. D. Aggarwal, E. Rashkovetsky, A. B. Korol and P. Michalak, 2016 Rapid genomic  
743 changes in *Drosophila melanogaster* adapting to desiccation stress in an experimental  
744 evolution system. *BMC Genomics* 17: 233.
- 745 Kapun, M., H. van Schalkwyk, B. McAllister, T. Flatt and C. Schlotterer, 2014 Inference of  
746 chromosomal inversion dynamics from Pool-Seq data in natural and laboratory  
747 populations of *Drosophila melanogaster*. *Mol Ecol* 23: 1813-1827.
- 748 Kelly, J. K., B. Koseva and J. P. Mojica, 2013 The Genomic Signal of Partial Sweeps in  
749 *Mimulus guttatus*. *Genome Biology and Evolution* 5: 1457-1469.



- 750 Kettlewell, H. D., 1958. A survey of the frequencies of *Biston betularia* (L.)(Lep.) and its  
751 melanistic forms in Great Britain. *Heredity* 12: 51-72.
- 752 Lang, G. I., D. P. Rice, M. J. Hickman, E. Sodergren, G. M. Weinstock *et al.*, 2013 Pervasive  
753 genetic hitchhiking and clonal interference in forty evolving yeast populations. *Nature*  
754 500: 571-574.
- 755 Levene, H., 1953 Genetic equilibrium when more than one ecological niche is available. *Amer.*  
756 *Natur.* 87: 331-333.
- 757 Levy, S. F., J. R. Blundell, S. Venkataram, D. A. Petrov, D. S. Fisher *et al.*, 2015 Quantitative  
758 evolutionary dynamics using high-resolution lineage tracking. *Nature* 519: 181-186.
- 759 Lewontin, R. C., 1964 THE INTERACTION OF SELECTION AND LINKAGE. I. GENERAL  
760 CONSIDERATIONS; HETEROTIC MODELS. *Genetics* 49: 49-67.
- 761 Lewontin, R. C., 1974 *The genetic basis of evolutionary change*. Columbia University Press,  
762 New York, NY.
- 763 Long, A., G. Liti, A. Luptak and O. Tenaillon, 2015 Elucidating the molecular architecture of  
764 adaptation via evolve and resequence experiments. *Nature Reviews Genetics* 16: 567.
- 765 Losos, J. B., K. I. Warheit and T. W. Shoener, 1997 Adaptive differentiation following  
766 experimental island colonization in *Anolis* lizards. *Nature* 387: 70-73.
- 767 Maynard Smith, J., and J. Haigh, 1974 The hitch-hiking effect of a favourable gene. *Genetic*  
768 *research* 23: 23-35.
- 769 Medland, S. E., N. Jahanshad, B. M. Neale and P. M. Thompson, 2014 Whole-genome analyses  
770 of whole-brain data: working within an expanded search space. *Nature neuroscience* 17:  
771 791-800.
- 772 Messer, P. W., S. P. Ellner and N. G. Hairston, Jr., 2016 Can population genetics adapt to rapid  
773 evolution? *Trends Genet* 32: 408-418.
- 774 Meyer, R. S., and M. D. Purugganan, 2013 Evolution of crop species: genetics of domestication  
775 and diversification. *Nat Rev Genet* 14: 840-852.
- 776 Michalak, P., L. Kang, P. M. Sarup, M. F. Schou and V. Loeschcke, 2017 Nucleotide diversity  
777 inflation as a genome-wide response to experimental lifespan extension in *Drosophila*  
778 *melanogaster*. *BMC Genomics* 18: 84.
- 779 Monnahan, P. J., and J. K. Kelly, 2017 The Genomic Architecture of Flowering Time Varies  
780 Across Space and Time in *Mimulus guttatus*. *Genetics*.
- 781 Moriyama, E. N., and J. R. Powell, 1996 Intraspecific Nuclear-Dna Variation In *Drosophila*.  
782 *Molecular Biology and Evolution* 13: 261-277.
- 783 Neher, R. A., and B. I. Shraiman, 2011 Genetic Draft and Quasi-Neutrality in Large  
784 Facultatively Sexual Populations. *Genetics* 188: 975-996.
- 785 Nuzhdin, S. V., and T. L. Turner, 2013 Promises and limitations of hitchhiking mapping. *Current*  
786 *Opinion in Genetics & Development* 23: 694-699.
- 787 Ohta, T., 1976 Role of very slightly deleterious mutations in molecular evolution and  
788 polymorphism. *Theor. Pop. Biol.* 10: 254-275.
- 789 Orozco-terWengel, P., M. Kapun, V. Nolte, R. Kofler, T. Flatt *et al.*, 2012a Adaptation of  
790 *Drosophila* to a novel laboratory environment reveals temporally heterogeneous  
791 trajectories of selected alleles. *Mol Ecol* 21: 4931-4941.
- 792 Orozco-terWengel, P., M. Kapun, V. Nolte, R. Kofler, T. Flatt *et al.*, 2012b Adaptation of  
793 *Drosophila* to a novel laboratory environment reveals temporally heterogeneous  
794 trajectories of selected alleles. *Molecular Ecology* 21: 4931-4941.

- 795 Palumbi, S. R., 2001 *The Evolution Explosion: How Humans Cause Rapid Evolutionary Change*.  
796 W.W. Norton, New York, NY, USA.
- 797 Pena, C. J., H. G. Kronman, D. M. Walker, H. M. Cates, R. C. Bagot *et al.*, 2017 Early life stress  
798 confers lifelong stress susceptibility *Science* 356: 1185-1188.
- 799 Plaisier, S. B., R. Taschereau, J. A. Wong and T. G. Graeber, 2010 Rank-rank hypergeometric  
800 overlap: identification of statistically significant overlap between gene-expression  
801 signatures. *Nucleic Acids Res* 38: e169.
- 802 Przeworski, M., J. D. Wall and P. Andolfatto, 2001 Recombination and the Frequency Spectrum  
803 in *Drosophila melanogaster* and *Drosophila simulans*. *Molecular Biology and Evolution*  
804 18: 291-298.
- 805 Remolina, S. C., P. L. Chang, J. Leips, S. V. Nuzhdin and K. A. Hughes, 2012 Genomic basis of  
806 aging and life-history evolution in *Drosophila melanogaster*. *Evolution* 66: 3390-3403.
- 807 Reznick, D. N., F. H. Shaw, F. H. Rodd and R. G. Shaw, 1997 Evaluation of the rate of evolution  
808 in natural populations of guppies (*Poecilia reticulata*). *Science* 275: 1934-1937.
- 809 Rose, M. R., 1984 Laboratory evolution of postponed senescence in *Drosophila melanogaster*.  
810 *Evolution* 38: 1004-1010.
- 811 Schou, M. F., V. Loeschcke, J. Bechsgaard, C. Schlotterer and T. N. Kristensen, 2017  
812 Unexpected high genetic diversity in small populations suggests maintenance by  
813 associative overdominance. *Mol Ecol*.
- 814 Schrider, D. R., D. J. Begun and M. W. Hahn, 2013 Detecting Highly Differentiated Copy-  
815 Number Variants from Pooled Population Sequencing, pp. 344-355 in *Pacific Symposium*  
816 *on Biocomputing*.
- 817 Signor, S. A., F. N. New and S. Nuzhdin, 2018 A Large Panel of *Drosophila simulans* Reveals  
818 an Abundance of Common Variants. *Genome Biology and Evolution* 10: 189-206.
- 819 Slobodkin, L. B., 1980 *Growth and Regulation in Animal Populations*. Dover, New York, NY.
- 820 Stuart, Y. E., T. S. Campbell, P. A. Hohenlohe, R. G. Reynolds, L. J. Revell *et al.*, 2014 Rapid  
821 evolution of a native species following invasion by a congener. *Science* 346: 463-466.
- 822 Sukumaran, J., and M. T. Holder, 2011 Ginkgo: spatially-explicit simulator of complex  
823 phylogeographic histories. *Molecular Ecology Resources* 11: 364-369.
- 824 Sved, J. A., T. E. Reed and W. F. Bodmer, 1967 The number of balanced populations that can be  
825 maintained in a natural population. *Genetics* 55: 469-481.
- 826 Teles, R. M. B., T. G. Graeber, S. R. Krutzik, D. Montoya, M. Schenk *et al.*, 2013 Type I  
827 Interferon Suppresses Type II Interferon-Triggered Human Anti-Mycobacterial  
828 Responses. *Science* 339: 1448-1453.
- 829 Thompson, J. N., 1998 Rapid evolution as an ecological process. *Trends in Ecology & Evolution*  
830 13: 329-332.
- 831 Tobler, R., S. U. Franssen, R. Kofler, P. Orozco-Terwengel, V. Nolte *et al.*, 2014 Massive  
832 habitat-specific genomic response in *D. melanogaster* populations during experimental  
833 evolution in hot and cold environments. *Mol Biol Evol* 31: 364-375.
- 834 True, J. R., J. M. Mercer and C. C. Laurie, 1996 Differences in crossover frequency and  
835 distribution among three sibling species of *Drosophila*. *Genetics* 142: 507-523.
- 836 Trut, L., I. Oskina and A. Kharlamova, 2009 Animal evolution during domestication: the  
837 domesticated fox as a model. *BioEssays : news and reviews in molecular, cellular and*  
838 *developmental biology* 31: 349-360.
- 839 Turner, T. L., and P. M. Miller, 2012a Investigating Natural Variation in *Drosophila*  
840 Courtship Song by the Evolve and Resequence Approach. *Genetics* 191: 633-642.

- 841 Turner, T. L., and P. M. Miller, 2012b Investigating natural variation in *Drosophila* courtship  
842 song by the evolve and resequence approach. *Genetics* 191: 633-642.
- 843 Turner, T. L., A. D. Stewart, A. T. Fields, W. R. Rice and A. M. Tarone, 2011a Population-based  
844 resequencing of experimentally evolved populations reveals the genetic basis of body  
845 size variation in *Drosophila melanogaster*. *Plos Genetics* 7.
- 846 Turner, T. L., A. D. Stewart, A. T. Fields, W. R. Rice and A. M. Tarone, 2011b Population-  
847 Based Resequencing of Experimentally Evolved Populations Reveals the Genetic Basis  
848 of Body Size Variation in *Drosophila melanogaster*. *PLOS Genetics* 7: e1001336.
- 849 Walsh, B., and M. Lynch, 2017 *Evolution and Selection of Quantitative Traits*.  
850 [http://nitro.biosci.arizona.edu/zbook/NewVolume\\_2/pdf/Chapter09.pdf](http://nitro.biosci.arizona.edu/zbook/NewVolume_2/pdf/Chapter09.pdf).
- 851 Ward, J. K., and J. K. Kelly, 2004 Scaling up evolutionary responses to elevated CO<sub>2</sub>: lessons  
852 from *Arabidopsis*. *Ecology Letters* 7: 427-440.
- 853 Wright, S., 1931 Evolution in mendelian populations. *Genetics* 16: 97-159.
- 854
- 855

856 **Figure 1. The maximum LRT test value for parallel selection per 100kb window along**  
857 **each chromosome. Red lines indicate centromeres.**

858

859 **Figure 2. The allele frequency spectrum is given for all SNPs in the ancestral populations**  
860 **(blue bars) and for those that tested significant for parallel selection (orange bars). The**  
861 **green broken lines denote proportions observed in a simulation of parallel selection on 20**  
862 **loci with initial allele frequencies sampled from genome wide distribution (see text).**

863

864 **Figure 3. Rank-rank hypergeometric tests of overlap in divergence between populations. The rank**  
865 **order of maximum divergence values in 100kb windows is compared. The color in each cell**  
866 **indicates the hypergeometric probability that the rank ordering of windows is independent in the**  
867 **two populations, after applying Benjamini-Yekutieli correction for multiple tests (Plaisier et al.**  
868 **2010). Each cell in the map represents 10 100kb windows, with windows ranked from those**  
869 **showing the greatest decrease in the reference allele frequency during laboratory adaptation**  
870 **(left/bottom) to those showing the greatest increase in reference allele frequency (right/top).**  
871 **Pattern of warm colors (small probability values) in cells in lower-left (upper-right) quadrats**  
872 **indicates that populations being compared tend to have the same windows ranking among the top**  
873 **(bottom) k windows, for many values of k.**

874

875 **Figure 4. The LRT test is applied to simulated data with 20 loci under selection**  
876 **(parameters reported in text). The maximum LRT test value for parallel selection per**  
877 **100kb window along chromosome 2. Each panel is a different simulation replicate.**

878

879

880

881 **Table 1. The estimated value of  $v$  for each chromosome in each replicate population.**

| Population | chromosome | Estimated null variance of divergence ( $v$ ) |
|------------|------------|-----------------------------------------------|
| A          | 2L         | 0.0174                                        |
| A          | 2R         | 0.0171                                        |
| A          | 3L         | 0.0228                                        |
| A          | 3R         | 0.0190                                        |
| A          | X          | 0.0152                                        |
| B          | 2L         | 0.0170                                        |
| B          | 2R         | 0.0189                                        |
| B          | 3L         | 0.0227                                        |
| B          | 3R         | 0.0173                                        |
| B          | X          | 0.0179                                        |
| C          | 2L         | 0.0159                                        |
| C          | 2R         | 0.0163                                        |
| C          | 3L         | 0.0200                                        |
| C          | 3R         | 0.0176                                        |
| C          | X          | 0.0191                                        |

882

883

884

885

886

887 **Supplemental Materials.**

888

889 **Table S1. The hash tables for two locus haplotype (gamete) frequencies are reported as a**  
890 **function of allele frequencies (minor allele at both loci) and the distance between loci.**

891 **Separate tables are given for autosomes and the X chromosome. The calculation**  
892 **procedures are described on front sheet.**

893

894 **Table S2. The 126 polymorphisms with an LRT test for parallel selection that exceed**  
895 **46.64. This threshold was established by permutation: The most extreme single test was**  
896 **less than 46.46 in 95% of the permuted datasets.**

897

898 **Table S3. The crossovers location distribution used for simulation based on data from *D.***  
899 **melanogaster from COMERON et al. (2012). Rates are reduced rates near telomeres and**  
900 **centromeres.**

901

902 **Table S4. The maximum LRT per chromosome (and genomewide) is reported for 1000**  
903 **permutations of the data.**

904

905 **Table S5. Putative CNV that evolved in parallel in the three replicate populations that**  
906 **overlap known coding and/or regulatory regions of *D. simulans* genes.**

907

908 **Table S6. A summary of results from simulation – each parameter set is a distinct letter**  
909 **(A-G) with statistics based on 1000 replicates of the entire experiment (three replicate**

910 **populations per experiment). The first part of each panel reports the mean and standard**  
911 **deviation (SD) of the null variance ( $v$ ) from each simulation on both the autosomes and X**  
912 **chromosome. The mean is across all chromosomes and replicates. The SD was calculated**  
913 **both within each experiment (across chromosomes) and across all chromosomes and**  
914 **replicates, SD (within) and SD (overall), respectively. The second part of each panel**  
915 **reports the distribution of LRT for parallel evolution at both autosomes and on the X-**  
916 **chromosome. Here, the numbers are sums across all simulation replicates with overall**  
917 **calculations for the fraction of tests with  $LRT > 20$  and  $LRT > 30$ , respectively.**

918

919 **Figure S1. (A) The distribution of changes in  $z$  between Ancestral and Descendant**  
920 **populations of replicate C (all SNPs). Here,  $z$  is the difference in transformed allele**  
921 **frequency ( $x_A - x_D$ ) divided by the standard deviation. (B) The average absolute change in**  
922  **$z$  (blue bars) and of untransformed allele frequency (orange bars) as a function of initial**  
923 **allele frequency. The latter is multiplied by 20 to be on same scale as the former.**

924

925 **Figure S2. Rank-rank hypergeometric tests of overlap in divergence between populations**  
926 **at different window sizes. The rank order of windows with respect to the maximum**  
927 **divergence within the window is compared, using 10kb and 1kb windows. The color in each**  
928 **cell indicates the hypergeometric probability that the rank ordering of windows is**  
929 **independent in the two populations, after applying Benjamini-Yekutieli correction for**  
930 **multiple tests (Plaisier et al. 2010). Each cell represents 75 10kb windows or 400 1kb**  
931 **windows, respectively, with windows ranked from those showing the greatest decrease in**  
932 **the reference allele frequency during laboratory adaptation (left/bottom) to those showing**

933 **the greatest increase in reference allele frequency (right/top). Pattern of warm colors**  
934 **(small probability values) in cells along the lower-left (upper-right) quadrats indicates that**  
935 **the rank order of windows in the two populations is more similar than expected by chance.**  
936 **Note difference in color scale in the two different analyses shown here and in the analysis of**  
937 **100kb windows shown in Figure 3 in the main text.**

938

939 **Figure S3. The average value for LD measured as  $r^2$  is reported as a function of**  
940 **chromosomal location. The mean refers to pairs of loci separated by 100-300kb and where**  
941 **the minor allele at each locus is greater than 10%. The red line is the centromere for**  
942 **chromosomes 2 and 3.**

943

944 **Supplemental.File.1.tar.gz :: The python programs LD.analysis1.py, LD.analysis2.py,**  
945 **LD.analysis3.py used for Table S1.**

946

947



# Maximum LRT per 100kb window

bioRxiv preprint doi: <https://doi.org/10.1101/337188>; this version posted June 3, 2018. The copyright holder for this preprint (which was not certified by peer review) is the author/funder. All rights reserved. No reuse allowed without permission.

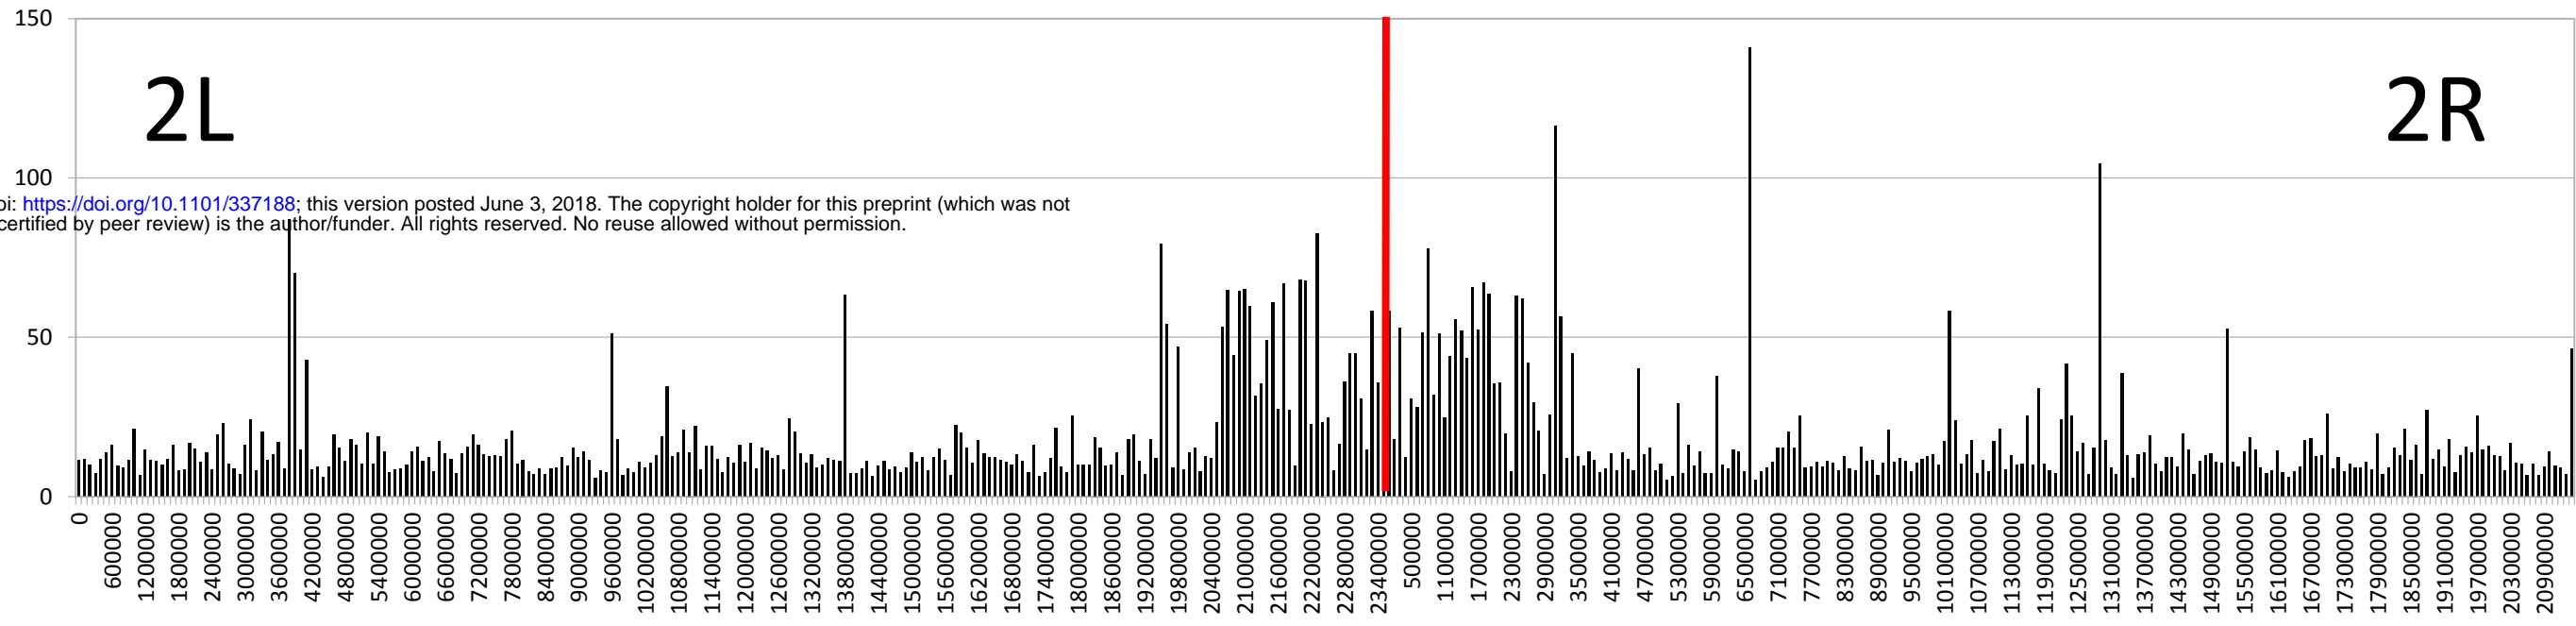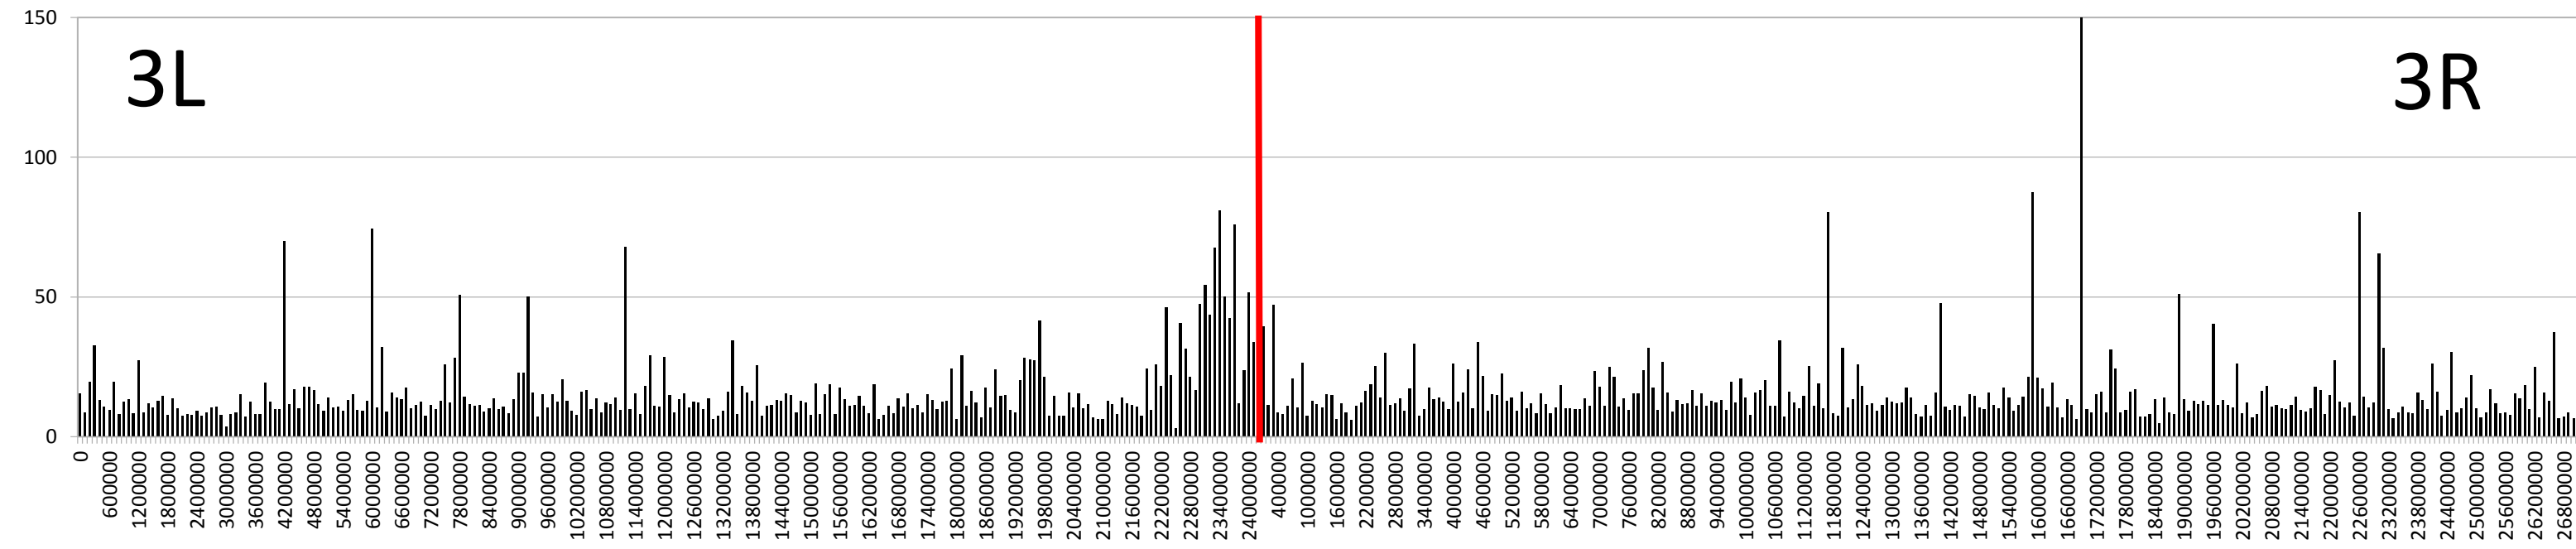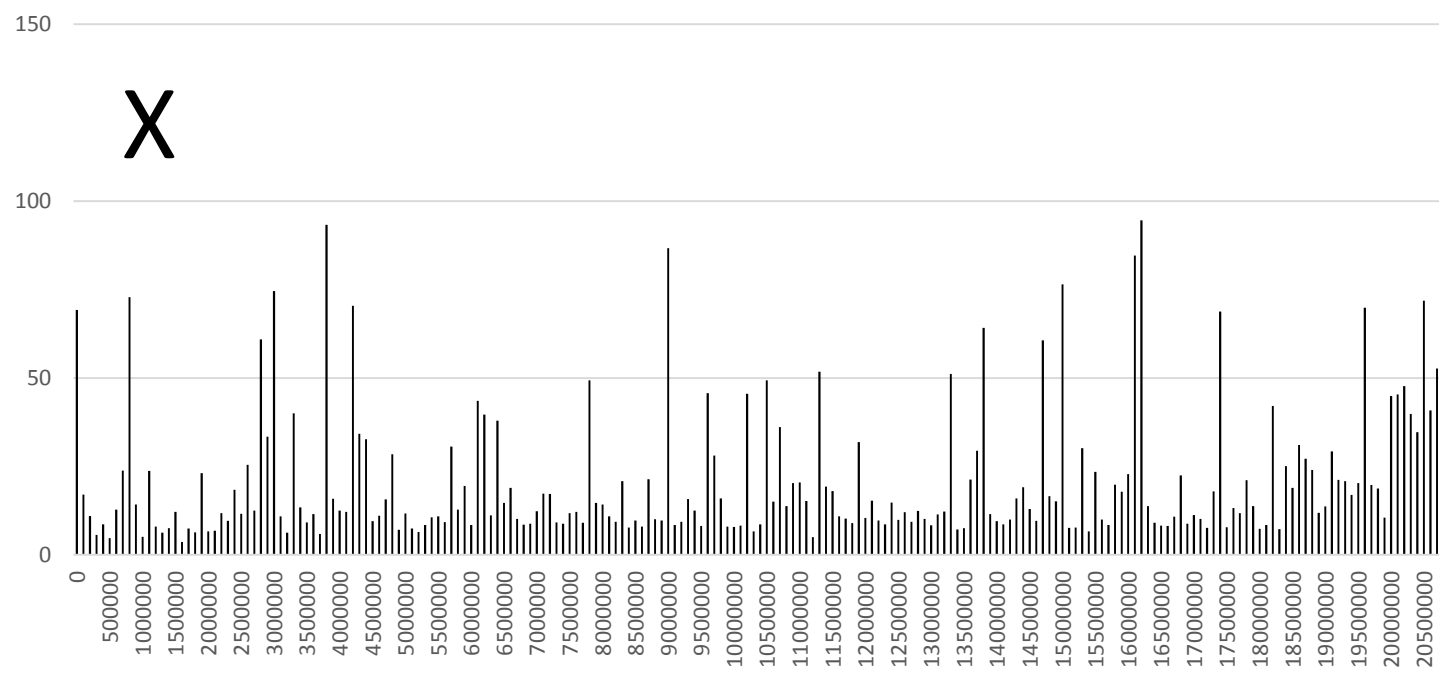

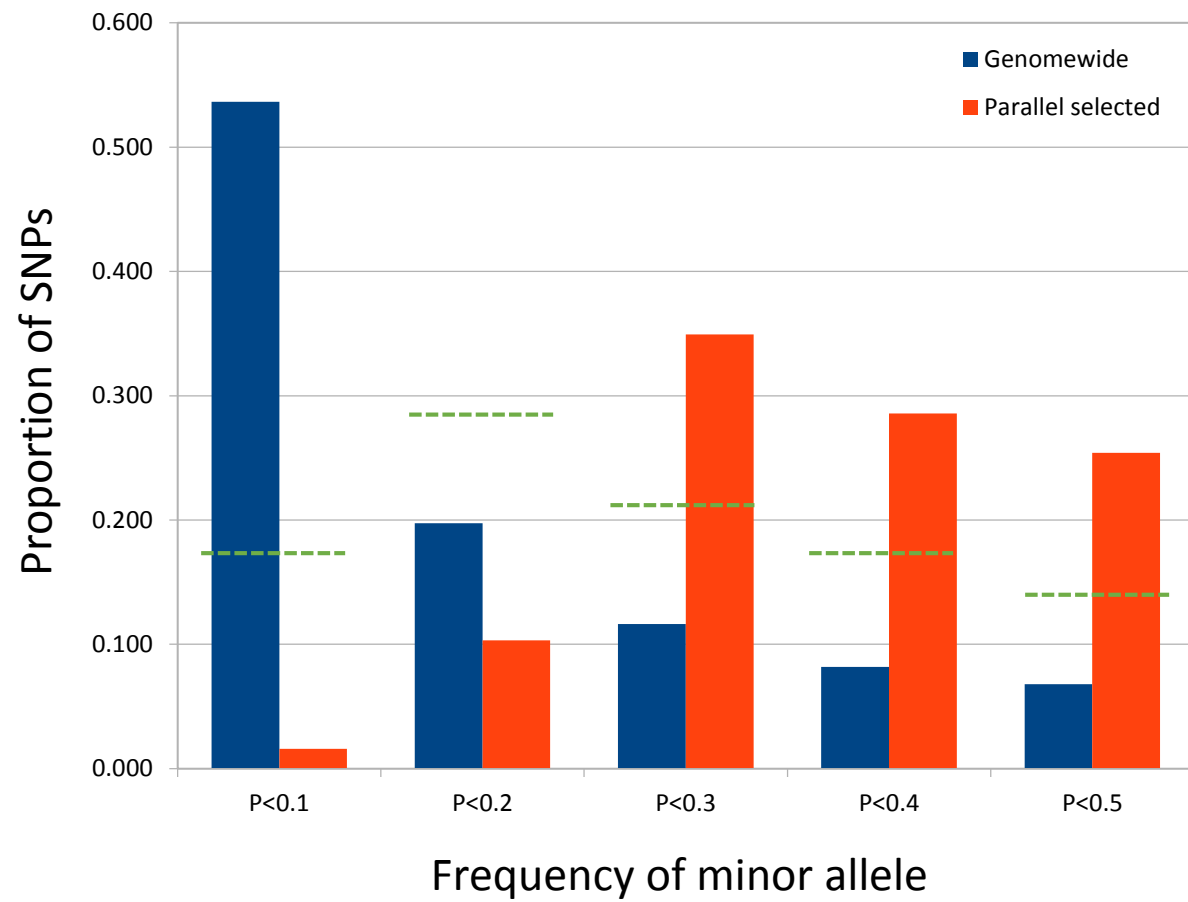

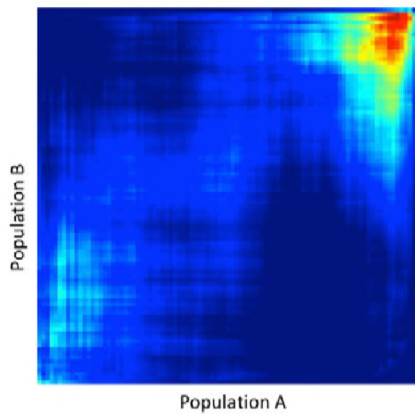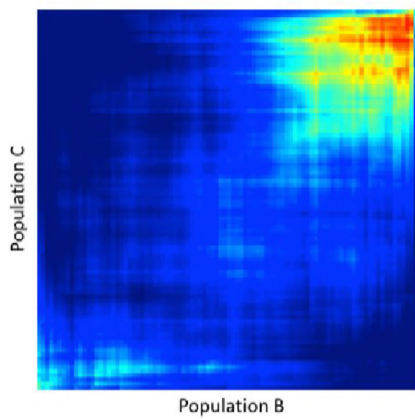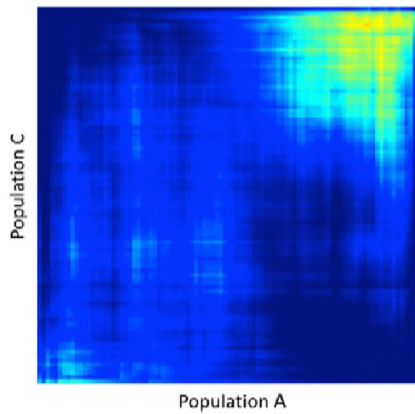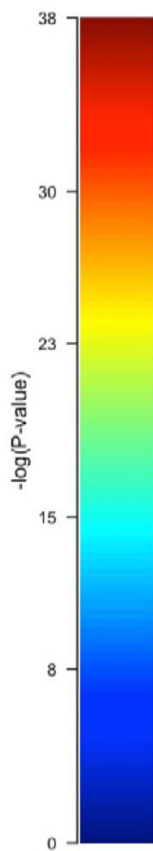

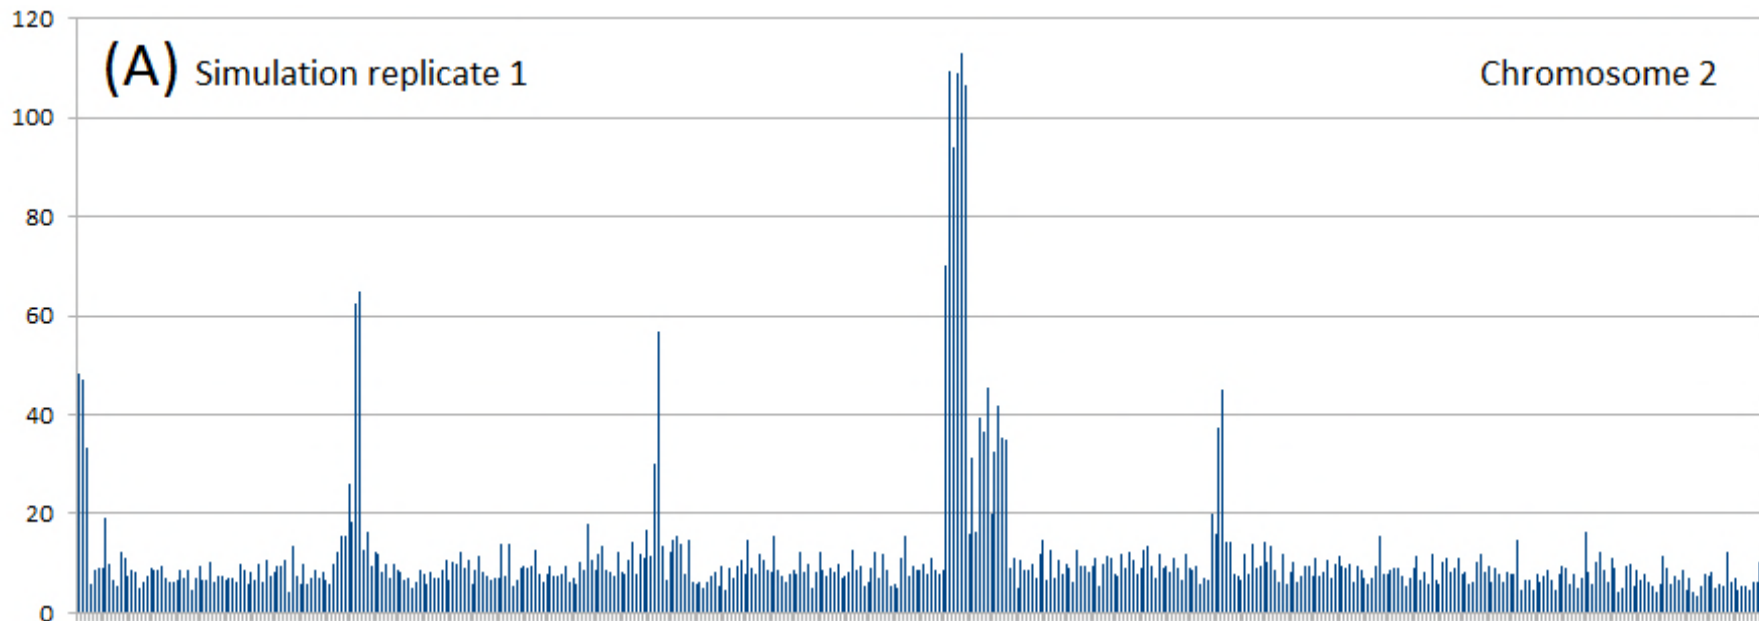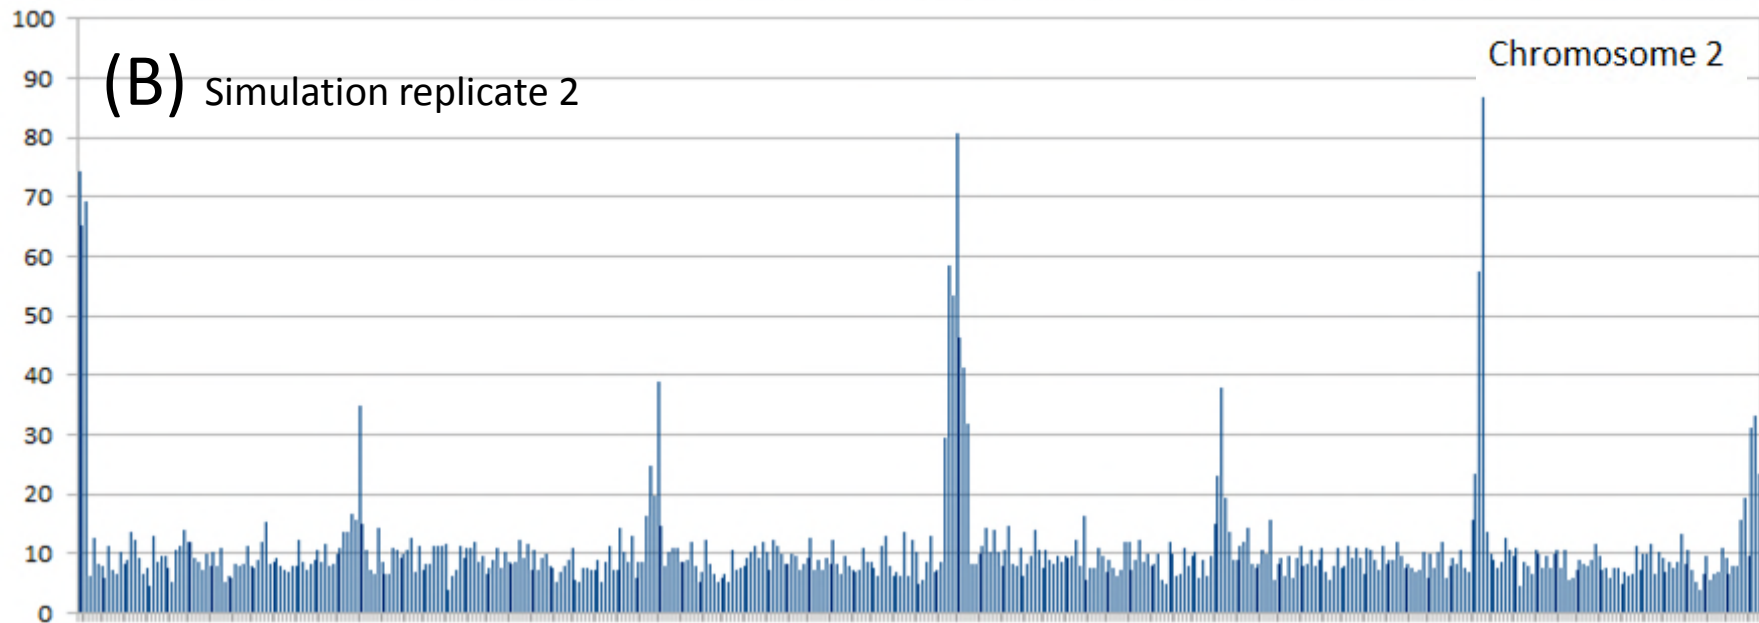

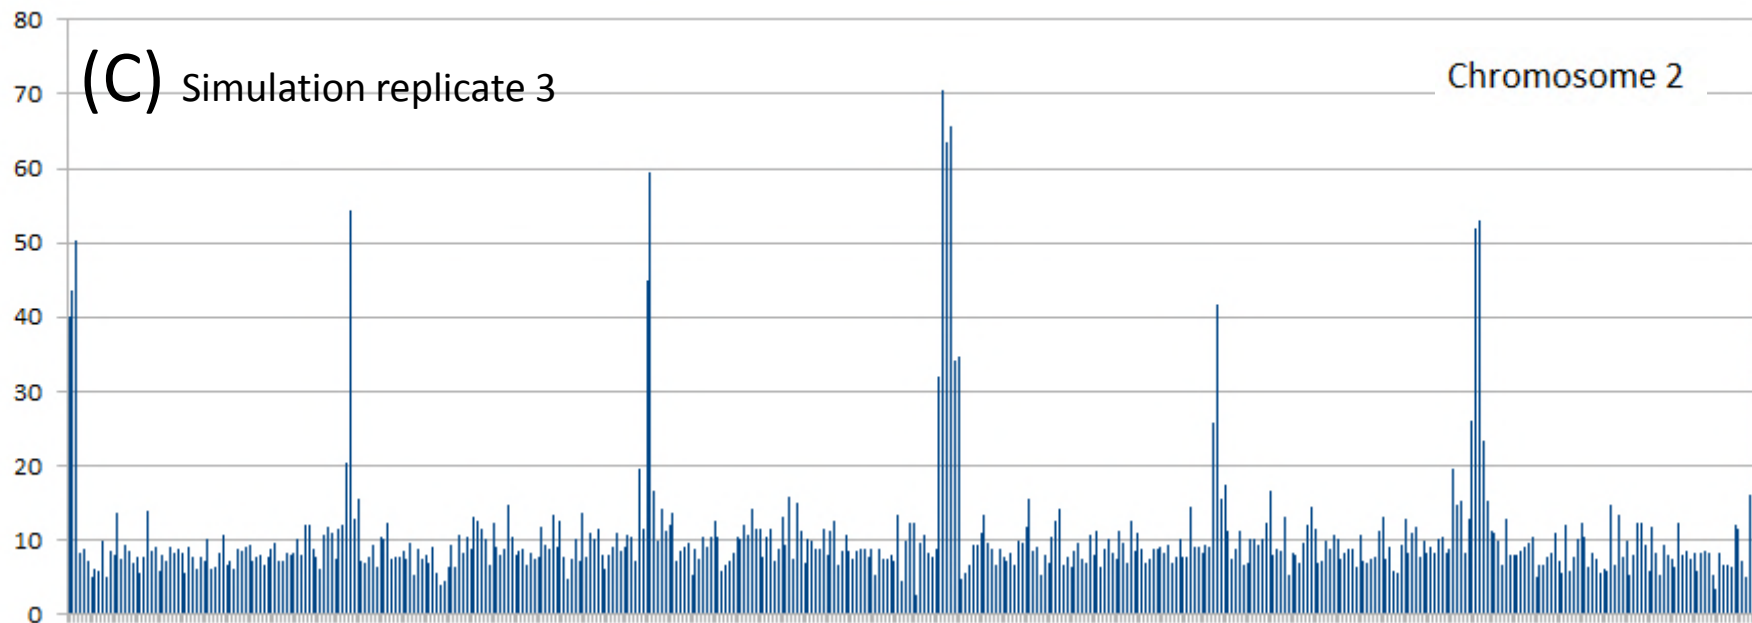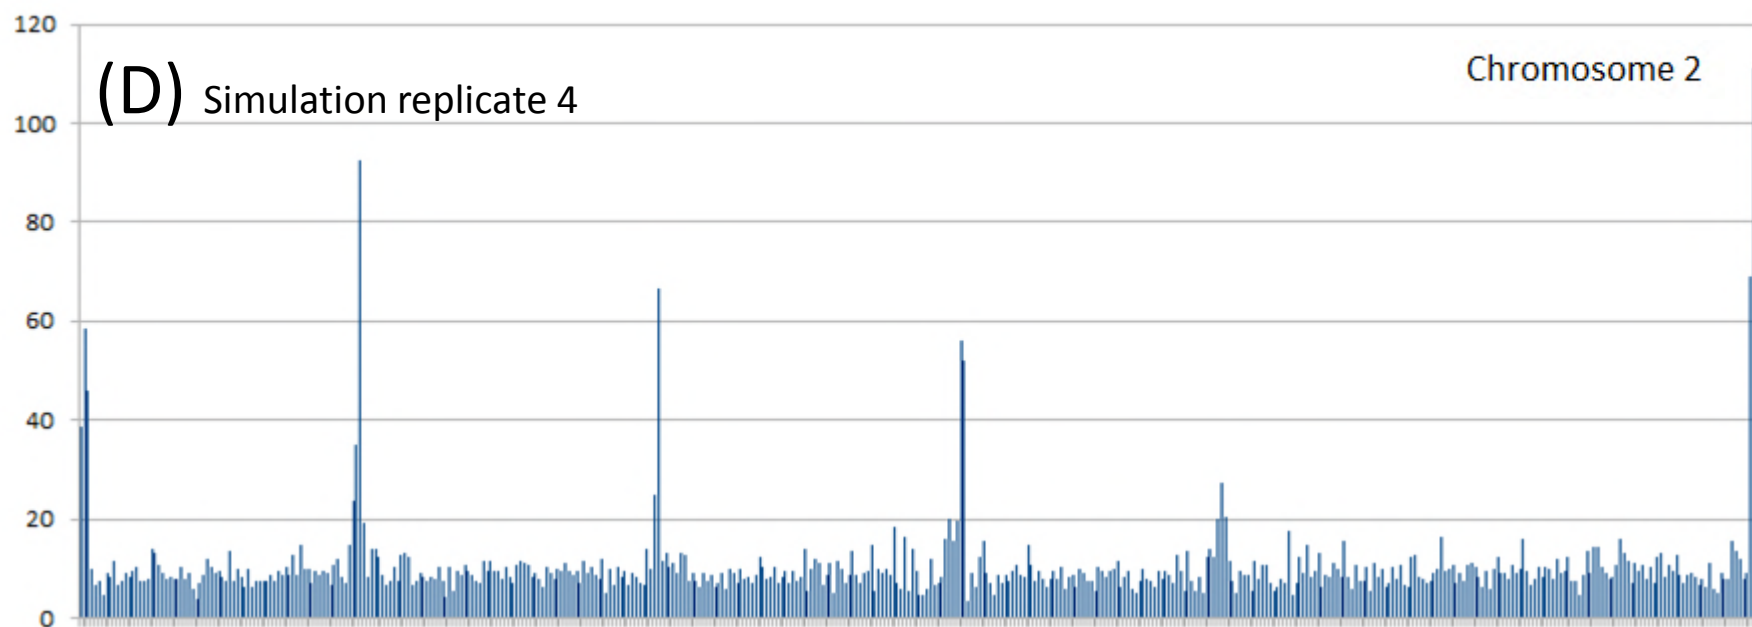

Source: https://www.biorxiv.org/content/10.1101/337188v1.full.pdf
